RUNNING TITLE: Effects of Nonpredictive and Predictive Spatial Cues on Consciousness

# **Distinct Contributions of Nonpredictive and Predictive Peripheral Cues to Visual Conscious Perception: an MEG study**

Alfredo Spagna<sup>1,2,\*</sup>, Dimitri J. Bayle<sup>3</sup>, Zaira Romeo<sup>4</sup>, Lydia Yahia-Cherif<sup>2</sup>, Ana B. Chica<sup>5</sup>,  
Paolo Bartolomeo<sup>2,\*</sup>

<sup>1</sup> Department of Psychology, Columbia University in the City of New York, NY, USA, 10027

<sup>2</sup> Sorbonne Université, Inserm U 1127, CNRS UMR 7225, Paris Brain Institute, ICM, Hôpital  
de la Pitié-Salpêtrière, 75013 Paris, France

<sup>3</sup> Licae Lab, Université Paris Nanterre, Nanterre, France

<sup>4</sup> Department of General Psychology, University of Padova, Padova 35131, Italy

<sup>5</sup> Department of Experimental Psychology; Mind, Brain, and Behavior Research Center  
(CIMCYC), University of Granada, Granada, Spain, 18071

12

\* Corresponding authors

Alfredo Spagna, Ph. D.

Department of Psychology,

Columbia University in the City of New York,

NY, USA, 10027

[as5559@columbia.edu](mailto:as5559@columbia.edu)

19

Paolo Bartolomeo, M.D., Ph.D.

Sorbonne Université, Inserm U 1127,

CNRS UMR 7225, Paris Brain Institute,

ICM, Hôpital de la Pitié-Salpêtrière,

75013 Paris, France

[paolo.bartolomeo@icm-institute.org](mailto:paolo.bartolomeo@icm-institute.org)

**RUNNING TITLE: Effects of Nonpredictive and Predictive Spatial Cues on Consciousness**

- 26    Number of pages: 39
- 27    Number of Figures (6) and Tables (1)
- 28    Number of words for abstract (208/250), introduction (648/650), discussion (1227/1500)
- 29    Conflict of interest statement (yes)
- 30    Author Contributions (yes)
- 31    Funding (yes)

**RUNNING TITLE:** Effects of Nonpredictive and Predictive Spatial Cues on Consciousness

## Abstract

Do we need attention to become aware of an external event? We used magnetoencephalography (MEG) in human participants to assess the effects of nonpredictive and predictive supra-threshold peripheral visual cues on the conscious perception of near-threshold Gabor patches. Both nonpredictive and predictive valid cues increased the number of detected targets, and shifted the response criterion towards a more liberal decision. Predictive cues unexpectedly induced a greater sensitivity ( $d'$ ) for invalid trials than for valid trials. With nonpredictive cues, seen targets were associated with right-lateralized frontoparietal feed-forward and feedback sweeps. For seen targets there was increased connectivity among visual regions, and between these areas and the inferior parietal lobes and the anterior insular cortices (AIC), bilaterally. Valid predictive cues interacted with conscious target detection, with greater activation of areas mostly located in the left hemisphere, especially in the frontoparietal network and temporoparietal junction, and induced an increased connectivity between the right AIC and areas of the visual ventral stream in the seen condition only. Thus, neural activity induced by nonpredictive and predictive spatial cues can enhance conscious visual perception through distinct mechanisms, mostly relying on frontoparietal activity in the right or left hemisphere, respectively. Connectivity involving the AIC participates in shaping the interaction between attention and conscious visual perception.

### Significance Statement

Do we need to pay attention to external objects in order to become aware of them?

Characterizing the spatiotemporal dynamics of attentional effects on visual perception is critical to understand how humans process information coming from relevant aspects of their environment. Participants detected near-threshold visual targets preceded by supra-threshold spatial cues with varying degrees of predictivity, while their brain activity was recorded using

RUNNING TITLE: Effects of Nonpredictive and Predictive Spatial Cues on Consciousness

57 magnetoencephalography. Results demonstrated that spatial cues, especially when predictive,  
58 biased participants' conscious perception through an early recruitment of frontoparietal  
59 regions. This work highlights an interactive pattern between spatial attention and  
60 consciousness, as shown by the effects of attention-related regions on visual sensory cortices  
61 bilaterally, consistent with the hypothesis that attention is a pathway to conscious perception.

# RUNNING TITLE: Effects of Nonpredictive and Predictive Spatial Cues on Consciousness

## 62 **Introduction**

63           The relationship between attention and consciousness remains debated. Some argue  
64 that conscious perception cannot occur without attention (Posner, 1994; Dehaene et al., 2006;  
65 Mashour et al., 2020); others propose that attention and consciousness are dissociable  
66 processes (Wyart and Tallon-Baudry, 2008; Tallon-Baudry, 2012). In spite of the growing  
67 effort devoted to characterizing the neural substrates supporting visual conscious perception,  
68 this quest is still open, possibly because attention is a heterogeneous psychological construct  
69 consisting of independent but interactive functions, which may differentially influence  
70 conscious visual perception.

71           Studies investigating how attention modulates conscious perception mainly focused on  
72 visuospatial orienting, which enhances the processing of stimuli appearing in a specific region  
73 of the visual field (Posner, 1980). Nonpredictive visual cues, which are not informative about  
74 the future location of the target, exogenously capture attention (Fan et al., 2002; Funes et al.,  
75 2007; Chica et al., 2013b; Spagna et al., 2015). For short stimulus-onset asynchronies (SOAs)  
76 a benefit in performance often occurs when the cue and the target appear on the same side  
77 (so-called “valid” trials), compared to when they occur on opposite sides (“invalid” trials).  
78 More endogenous, or goal-driven forms of orienting occur with predictive cues that correctly  
79 indicate the location of the upcoming target in most trials. Neuroimaging studies have shown  
80 partially distinct neural processes underlying exogenous and endogenous orienting (Corbetta  
81 and Shulman, 2002; Fan et al., 2005; Chica et al., 2013b; Xuan et al., 2016), but the  
82 spatiotemporal dynamics of these mechanisms remain unclear, possibly due to insufficient  
83 temporal resolution.

84           Longstanding evidence indicates that nonpredictive orienting cues improve conscious  
85 perception (Chica et al., 2011b; Sergent et al., 2013). However, the effects of endogenous  
86 orienting remain more controversial (Ling and Carrasco, 2006; Koch and Tsuchiya, 2007;

# RUNNING TITLE: Effects of Nonpredictive and Predictive Spatial Cues on Consciousness

Kentridge et al., 2008; Liu et al., 2009; Van Boxtel et al., 2010; Tsuchiya and Koch, 2014, 2016; Botta et al., 2017; Vernet et al., 2019). Peripheral predictive cues engage a mix of exogenous and endogenous orienting mechanisms, because they initially capture attention exogenously, but as time passes attention is endogenously kept at the cued location. This endogenous persistence is apparently strategic, because it is more likely that the target appears at the cued location (but see Bartolomeo et al., 2007). A series of studies (Chica et al., 2011b; Chica et al., 2013b; Botta et al., 2017) showed that exogenous attention affects perceptual consciousness, and that the maximal attentional effect on conscious perception is observed when attention is first exogenously captured, and then endogenously maintained at the target location. Characterizing the spatial and temporal dynamics of the neural substrates supporting possible interactions between attentional orienting and visual conscious processing could reduce the tension between competing, but not necessarily mutually exclusive, theoretical frameworks.

Here, we addressed two questions: (1) What are the spatiotemporal dynamics of the effects of peripheral cues on visual conscious processing? (2) How does cue predictivity modulate these effects? We recorded magnetoencephalography, capitalizing on its unique capacity to characterize a wide range of neural dynamics (Baillet, 2017), while participants performed a version of a Posner-type cueing paradigm (Chica et al., 2014b) with supra-threshold peripheral cues and near-threshold Gabor targets. In different experiments, spatial cues were either nonpredictive or predictive of the site of occurrence of targets. This setting enabled us to examine the effects of cues on conscious visual perception, in terms of behavioral effects, neural activity, and brain connectivity.

The gateway hypothesis would be supported by findings of increased reportability of the target stimuli under conditions of increased attention (i.e., valid cues) (Posner, 1994), perhaps with larger effects for predictive than for nonpredictive cues (Chica et al., 2011b),

# RUNNING TITLE: Effects of Nonpredictive and Predictive Spatial Cues on Consciousness

and a possible involvement of frontoparietal attention networks in the interaction between attention and consciousness (Chica et al., 2013c). The absence of cue validity effects on conscious perception would instead favor the cumulative influence hypothesis (Wyart and Tallon-Baudry, 2008; Tallon-Baudry, 2012), together with an absence of interaction between attention and consciousness in frontoparietal activations.

## Materials and Methods

*Participants.* To estimate the sample size required to detect a difference in  $d'$  for valid and invalid cue trials, we conducted a statistical power analysis using the parameters estimated in our previous study (Chica et al., 2011b). With  $\alpha = 0.05$ , an expected power of 0.80 and an effect size of 0.81, the projected sample size needed was of  $n = 15$  (two-tailed). We also conducted a statistical power analysis to estimate the sample size required to detect a difference in *criterion* for valid and invalid cue trials in the experiment with predictive cues. With  $\alpha = 0.05$ , an expected power of 0.80, and the effect size of 1.53 as shown in previous research (Chica et al., 2011b), the projected sample size needed was of  $n = 6$  (two-tailed).

In total, 37 participants were recruited across two experiments. Eighteen participants completed the experiment with nonpredictive cues (age =  $24 \pm 3.13$  years; age range = 22-33 years; 6M), and nineteen participants completed the experiment with predictive cues (age =  $24 \pm 3.79$  years; age range = 20-32 years; 7M). Five participants had to be excluded from data analysis of the predictive cue experiment, due to issues in the data quality of MEG recordings. All participants reported normal or corrected-to-normal vision, and gave written informed consent before participation. The study was approved by the INSERM and by the Institutional Review Boards of Paris Ile de France (CPP 1).

*Stimuli and Procedure.* The tasks were compiled and run using E-Prime software (RRID: SCR\_009567; Psychology Software Tools, Pittsburgh, PA) on a Windows XP desktop

# RUNNING TITLE: Effects of Nonpredictive and Predictive Spatial Cues on Consciousness

computer. All stimuli were presented on a gray background at the center of a black projection screen using a PROPixx projector (resolution,  $1050 \times 1400$  pixels; refresh rate, 60 Hz) located outside the shielded recording room. **Fig 1a.** shows a schematic representation of the sequence of events in an invalid trial. **Fig 1b.** illustrates size of the stimuli used in our tasks. The display consisted of three black boxes ( $3.6^\circ \times 4.9^\circ$  of visual angle) presented on a gray background; the central one was presented at the center of the screen and contained a fixation point (a black cross) at its center. The other two boxes were located  $6^\circ$  of visual angle to the left and right side and  $4^\circ$  of visual angle below the central box, respectively, a setting created to maximize MEG responses from early visual areas (Portin et al., 1999).

Participants sat in the MEG recording room, with the screen being positioned approximately 80 cm away from their eyes, and performed two tasks sequentially: 1) a discrimination task, which required to identify the orientation of a Gabor patch (spatial frequency: 5 cycles per degree of visual angle; diameter:  $2.5^\circ$  of visual angle; orientation: chosen among 12 equally spaced between 0 and  $180^\circ$ , vertical and horizontal orientations being excluded) that was presented for 16ms in either the box to the left or to the right side of the display. After a 484ms delay, participants were asked to press a button on a response box with 3 vertical buttons to indicate the orientation of the grating among two possibilities presented vertically on the screen, distant by  $3^\circ$  from each other. Participants pressed the upper response button with their index finger to choose the upper orientation or the middle response button with their middle finger to choose the lower orientation. The location of the correct orientation was randomized. After the participants' response, or after 3s without response, 2) a detection task was presented, which required to press one of the three buttons of the response box to indicate whether the target was absent, or whether it had been presented in the left or right box. Two arrow-like stimuli ( $>>>>>>$  or  $<<<<<<$ ) were presented above and below the fixation cross, their respective position being randomized



# RUNNING TITLE: Effects of Nonpredictive and Predictive Spatial Cues on Consciousness

across trial, and the word “absent” presented under the arrow-like stimuli. For trials in which participants reported to have seen a stimulus, they then pressed the upper or lower response button (with their index or middle finger, respectively) to indicate the visual hemifield of the target presentation. For trials in which participants reported to have not seen the stimulus, they pressed the lower response button with their ring finger. After the participants’ response, or after 3s without response, the next trial began after a variable delay of 1 to 1.5 s.

Before the recording session, participants were briefly instructed about the goal of the study and were then shown instructions on the screen. Each participant underwent a calibration session (mean duration, 6 min), during which the target contrast was manipulated in order to estimate the individual threshold for which the percentage of consciously perceived target was 50%. The calibration session consisted of two randomly inter-leaved psychophysical staircases (one-up / one-down), theoretically converging toward a detection rate of 50%. During the calibration session, participants were engaged in the same paradigm as described previously, except that the contrast of the stimuli was varied from trial to trial depending on their previous seen – unseen report in the corresponding staircase. Threshold contrasts were estimated separately for the valid and invalid locations. The calibration session was followed by eight recording sessions (mean duration, 8 min per session).

Each trial started with a fixation display, whose duration varied randomly between 1,000ms and 1,500ms. In the target-present trials, a cue occurred 300ms before targets, in the form of a black dot with a 1° diameter, and presented for 50ms near the external upper corner of one of the two peripheral boxes. Such a small cue was used in order to avoid possible phenomena of perceptual interference with the subsequent, near-threshold target.

*Experimental designs and statistical analyses.* In the nonpredictive cue experiment, each of the eight MEG recording sessions consisted of 110 trials, including 88 stimulus-present trials (in which stimuli at threshold contrast were presented either in the left or right

# RUNNING TITLE: Effects of Nonpredictive and Predictive Spatial Cues on Consciousness

lower visual quadrants) and 22 stimulus-absent trials (in which no stimulus was presented). The total number of trials was 880, with 50% valid cue trials (352 trials), 50% invalid cue trials (352 trials), and 176 catch trials. Fifty percent of the targets were presented at the cued location (valid cue condition); the other 50% was presented at the uncued location (invalid cue condition) (**Fig. 1c**). Trials within a recording session were presented in a different randomized order for each subject.

In the experiment with predictive cues, parameters of stimulus size and timing of presentation were the same as those used in the nonpredictive cue experiment, except that the total number of trials on each of the eight MEG recording sessions consisted of 784 trials, with 67% valid cue trials (448 trials), 33% invalid cue trials (224 trials), and 112 catch trials (**Fig. 1d**).

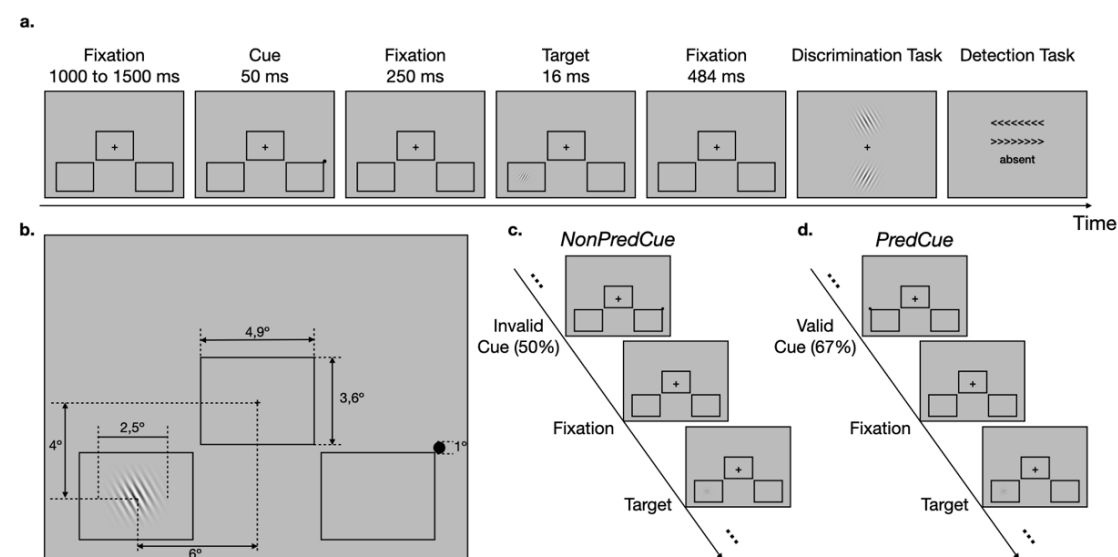

**Figure 1 a.** Schematic representation of the sequence of events in an invalid-cue trial. **b.** Size of the stimuli and exact location of presentation on the screen. The experiment with nonpredictive cues (*NonPredCue*) and the experiment with predictive cues (*PredCue*) shared the same sequence of event and size of stimuli; **c.** in the *NonPredCue* experiment 50% of cues were valid and 50% were invalid; **d.** in the *PredCue* experiment 67% of cues were valid and 33% were invalid.

# RUNNING TITLE: Effects of Nonpredictive and Predictive Spatial Cues on Consciousness

*MEG recordings.* Continuous MEG recordings were conducted at the CENIR (<http://www.cenir.org>) with an ELEKTA Neuromag TRIUX<sup>®</sup> machine (204 planar gradiometers and 102 magnetometers) located in a magnetically shielded room with a sampling frequency rate of 1kHz and a bandwidth ranging from 0.01 to 300 Hz. The recordings were then MaxFiltered (v2.2) (Taulu and Simola, 2006) to attenuate environmental noise, Signal Space Separation (SSS) was then implemented, automatic detection of bad channels was conducted, data were filtered (1 to 250 Hz), and resampled at a rate of 250Hz, and then converted in the Fieldtrip structure (RRID: SCR\_004849; <http://www.fieldtriptoolbox.org/>) (Oostenveld et al., 2011) to conduct further preprocessing and analytic steps. Cardiac activity (electrocardiogram – ECG), vertical and horizontal EOG signals were also recorded together with the electrophysiological data. The exact timing of the presentation of the stimuli onset was corrected in accordance to the signal received from a photodiode located in the MEG room, in order to adjust to the delay produced by the refresh rate of the projector.

*Preprocessing and Artifact Rejection.* Additional preprocessing steps were conducted using Fieldtrip and included an initial visual inspection of the recordings conducted by two of the authors (D.J.B. and Z.R.) to exclude segments with artifacts and ensure data quality control. Electroculogram (EOG) recordings from both vertical and horizontal sensors were then used to reject trials in which eye movements (beyond 3°) occurred. Rejection thresholds for both horizontal and vertical EOG traces was set to  $\pm .66V$ , corresponding to a deviation greater than 3° of visual angle (and with the target at 6° of visual angle). Trials with excessive eye movements and eye blinks (~10.52% of trials) were rejected offline from the MEG traces according to the 3° threshold mentioned above. Signal from the photodiode was used to discard 1) trials with a delay between the trigger and the photodiode greater than 300ms; 2) trials with a delay between the cue and the target greater than 827ms; 3) trials in which the

# RUNNING TITLE: Effects of Nonpredictive and Predictive Spatial Cues on Consciousness

delay between the trigger of the cue and the photodiode was greater than 40ms or smaller than 30ms, for a total of ~1% of the trials. Last, trials contaminated by muscular activity (jump or movement) were rejected manually upon visual inspection (~15%). For the nonpredictive cue experiment, out of the 15,840 trials acquired, 8517 trials were analyzed (*right visual field*: seen invalid = 1033; seen valid = 1284; unseen invalid = 1056; unseen valid = 882; *left visual field*: seen invalid = 1191; seen valid = 1176; unseen invalid = 956; unseen valid = 939). For the predictive cue experiment, out of the 10,796 trials acquired in total, 7454 trials were analyzed (*right visual field*: seen invalid = 396; seen valid = 1588; unseen invalid = 812; unseen valid = 1379; *left visual field*: seen invalid = 639; seen valid = 1144; unseen invalid = 576; unseen valid = 1379) (see **Table S1** for a subject-by-subject breakdown of the number of trials in each condition remaining after artifact rejection).

*Event-Related Magnetic Fields.* Data from 102 neuromag channels was analyzed in this study. A Matlab® script was used to separate the MEG continuous recordings into 2300ms-long epochs (ranging from -1000 before the cue and 1300ms after the cue), and epochs from the eight experimental conditions from each participant were then imported into Brainstorm (Tadel et al., 2011). For each condition, event-related magnetic fields were then averaged (weighted) along their entire length (2300ms).

*Source reconstruction.* Signal amplitude from the 15,000 cortical elemental dipoles underlying the signals measured by the sensors were then estimated from the epochs using the weighted minimum norm estimation (wMNE) imaging method as implemented in Brainstorm (Tadel et al., 2011), which first identifies a current source density image fitting the data through the forward model, and then favors solutions that are of minimum energy by using source covariance as a prior. To use this method, a noise covariance matrix was estimated for each subject from the recordings using the pre-stimulus interval (-1,000 to -2ms before the presentation of the cue), while constrained source covariance model was used to model one

# RUNNING TITLE: Effects of Nonpredictive and Predictive Spatial Cues on Consciousness

dipole, oriented normally to the surface. Further processing conducted on the sources per participant consisted of z-score transformation of the signal with reference to the baseline (from -1,000 to -2ms). A spatial smoothing kernel (FWHM = 3mm) was then applied on the sources, that were then re-interpolated (projected) on a common template (default anatomy). *MRI recordings.* High-resolution T1-weighted structural MRI images (MPRAGE sequence, flip-angle, 9; Repetition Time, 2300ms; Echo Time, 4.18ms; voxel size: 1 × 1 ×1 mm) were acquired for each participant using a 3-T Siemens, TRIO whole-body MRI scanner (Siemens Medical Solutions, Erlangen, Germany) located at the CENIR MRI center (Salpêtrière Hospital, Paris, France). After acquisition, images were then segmented using the FreeSurfer “recon-all” pipeline (Fischl, 2012), and imported in Brainstorm (Tadel et al., 2011) for co-registration purposes. MEG sensors and structural MRI images were first manually aligned using the nasion/left ear/right ear (NAS/LPA/RPA) fiducial points recorded in the MEG file and in the MRI MNI coordinates. Co-registration was then further refined using the “refine using head points” option on Brainstorm, which uses an iterative closest point algorithm to fit the head shape and the digitized scalp points. Additional details about the MRI-MEG co-registration steps as done in Brainstorm can be found here (Tadel et al., 2019). *Behavioral Data Analysis.* Response times (RTs) below 150ms (anticipated responses) and above 1,800ms (delayed responses) were excluded from subsequent analyses (below 2% of total number of trials). Independent sample *t*-tests were used to assess potential differences in the thresholds sampled during the calibration sessions separately for invalid and valid cue trials. Analysis of Variance (ANOVA) and Signal Detection Theory (SDT) analyses were conducted to examine whether and how nonpredictive and predictive cues modulated visual conscious perception. The Kolmogorov-Smirnov and the Shapiro Wilk test for normality were conducted to examine whether the data on accuracy was normally distributed. For both RT and Accuracy (in percentage), a 2 (seen, unseen) × 2 (valid, invalid) repeated measures

# RUNNING TITLE: Effects of Nonpredictive and Predictive Spatial Cues on Consciousness

ANOVA was conducted on correctly discriminated responses. These analyses were conducted to examine behavioral differences between trials reported as seen or unseen under the valid and invalid cue conditions. SDT was conducted to estimate changes in the signal to noise ratio as a function of cue validity condition ( $d'$ ), and to investigate whether the presence of a cue could bias the observer towards a more liberal reporting threshold (*criterion*). For the  $d'$ , participants' performance was estimated using the standardized difference between target-present (Hits:  $z(H)$ ) and target-absent (false alarms:  $z(F)$ ) trials, by dividing the percentage of correctly detected trials by the number of false alarms (FA: trials in which participants reported having seen the stimulus); zero false alarm rates ( $n = 12$ ) were corrected using the following formula ( $FA = (FA + 0,5) / (FA + CR + 1,0)$ ) (Snodgrass and Corwin, 1988). The greater the value of  $d'$ , the higher the quantity between the noise and the signal distribution (i.e., the signal/noise ratio). The *criterion* ( $C$ ) summarizes the distance of the threshold relative to the noise distribution  $B$  from the threshold of an ideal observer ( $-0.5 * ([z(H) + z(F)])$ ). A negative value of  $C$  represents a more liberal threshold, while a positive value of  $C$  represents a more conservative threshold. Both  $d'$  and  $C$  were estimated separately for valid and invalid trials, and paired sample  $t$ -test was used to assess differences in  $d'$  and *criterion* between these two conditions.

*MEG data analysis.* In parallel with the behavioral analyses,  $2$  (seen, unseen)  $\times$   $2$  (valid, invalid)  $\times$   $2$  (left, right) repeated-measures ANOVAs were conducted on individuals' estimated activity (z-scores) of reconstructed source images to examine how neuronal activity induced by nonpredictive cues can enhance conscious perception. Spatiotemporal cluster-based permutation tests (Maris and Oostenveld, 2007) were used for comparing main effects and interactions between brain activations in the time window between 0 and 800ms (locked to cue onset), with the number of permutations set to 1000 and the alpha threshold level set to 0.05 for all tests.

# RUNNING TITLE: Effects of Nonpredictive and Predictive Spatial Cues on Consciousness

*Connectivity Analysis.* To examine the modulation in connectivity between brain areas as a result of the experimental conditions, we estimated leakage-controlled (orthogonalized) high-gamma (60 to 90 Hz) amplitude envelope correlation (AEC) (Brookes et al., 2012; Colclough et al., 2015) of eighteen regions of interest (ROIs). Analyses were conducted solely on the high-gamma frequency band because of the extensive knowledge on the role of the oscillatory synchronization in this frequency band in spatial attention and its modulation of visual areas (Tallon-Baudry et al., 2005; Magazzini and Singh, 2018; Fiebelkorn and Kastner, 2019). ROIs were selected on the basis of previous results (Corbetta and Shulman, 2002; Fan et al., 2005; Tallon-Baudry et al., 2005; Bressler et al., 2008; Chica et al., 2013c; Chica et al., 2016b; Xuan et al., 2016), showing their involvement in attention-related processes. In addition, areas of the ventral visual stream were also added to the ROI analyses to examine potential frontoparietal modulation of activity in early and late visual areas. The ROIs were created using Brainstorm (Tadel et al., 2011), seed vertices and area (in cm<sup>2</sup>) of the ROIs are listed in **Table 1** (in MNI coordinates). Paired sample *t*-tests ( $p < .05$ , FDR corrected) were used to compare the AEC estimates across experimental conditions.

## Results

*Does the validity of nonpredictive cues affect participants' response to visual Gabor targets?* To answer this question, we examined behavioral responses to seen and unseen targets separately for valid and invalid nonpredictive cues. Valid cues, compared to invalid cues, lowered the response criterion (mean  $\pm$  SD valid:  $0.85 \pm 0.28$ ; invalid:  $1.03 \pm 0.27$ ;  $t(17) = -2.82$ ;  $p < .05$ ), and increased the percentage of detected targets (mean  $\pm$  SD valid:  $0.57 \pm 0.09$ ; invalid:  $0.52 \pm 0.11$ ;  $t(17) = -3.08$ ;  $p < .01$ ). However, sensitivity ( $d'$ ) was similar for valid and invalid trials (valid:  $2.30 \pm 0.57$ ; invalid:  $2.29 \pm 0.47$ ;  $t(17) < 1$ ) (see **Fig 2**). These results did not depend on different perceptual thresholds resulting from the calibration session, because these thresholds were similar for valid trials (43.98%) and for invalid trials

# RUNNING TITLE: Effects of Nonpredictive and Predictive Spatial Cues on Consciousness

(43.99%;  $t < 1$ ). Left- and right-sided targets evoked a similar number of correct responses (sum of the total number of correctly discriminated targets presented to the left visual field: 3,489; mean  $\pm$  SD:  $194.83 \pm 37.05$ ; sum of the total number of correctly discriminated targets presented to the right visual field: 3,507; mean  $\pm$  SD:  $194.83 \pm 33.6$ ; Wilcoxon signed-rank test = 76;  $p = .70$ ; Bayesian Wilcoxon signed-rank test  $BF_{10} = 0.56$ , with median posterior  $\delta = -0.079$ , 95% CI [-1.07, 0.91]).

As expected, participants were more accurate in discriminating the orientation of *Seen* targets ( $79.2 \pm 14.0\%$ ) than that of *Unseen* targets ( $50.2 \pm 7.0\%$ ) [ANOVA with *Consciousness* (seen, unseen), *Visual Field* (left, right), and *Validity* (valid, invalid) as factors,  $F_{(1,17)} = 85.60$ ;  $p < .0001$ ;  $\eta^2 = .84$ ] (**Fig 2a**). No other factors or interactions reached statistical significance.

A similar ANOVA conducted on RTs (see **Fig 2b**) revealed a main effect of *Consciousness* ( $F_{(1,17)} = 102.65$ ;  $p < .0001$ ;  $\eta^2 = .86$ ), because participants were slower for *Seen* targets ( $1034 \pm 115\text{ms}$ ) than for *Unseen* targets ( $601 \pm 190\text{ms}$ ). No other factors or interactions reached significance.



# RUNNING TITLE: Effects of Nonpredictive and Predictive Spatial Cues on Consciousness

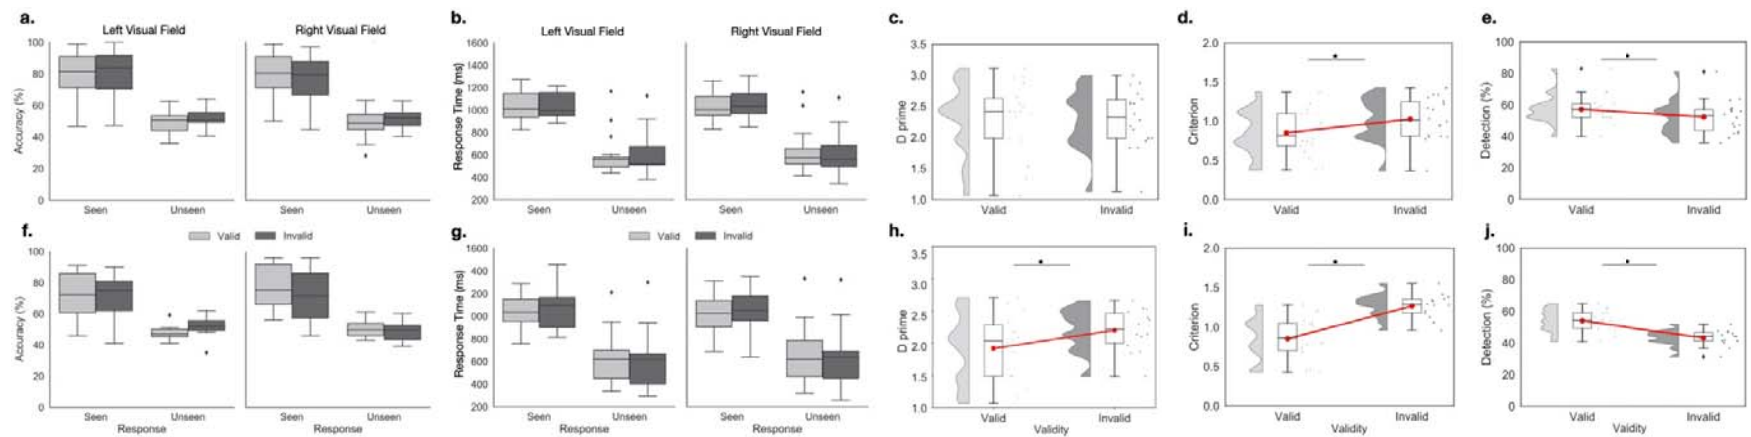

**Figure 2.** Results of the behavioral analyses conducted on performance with nonpredictive cues (a.-e.) and with predictive cues (f.-j.). **a.** and **b.** report result of the ANOVA conducted on Accuracy (in percentage) and RTs (in ms), respectively, while **c.**, **d.**, and **e** report result of the Signal Detection Theory analysis for  $d'$ , criterion, and detection (in percentage). **f.** and **g.** report result of the ANOVA conducted on Accuracy (in percentage) and RT (in ms), respectively, while **h.**, **i.**, and **j.** report results of the SDT analysis for  $d$  prime, criterion, and detection (in percentage).

# RUNNING TITLE: Effects of Nonpredictive and Predictive Spatial Cues on Consciousness

**Does the validity of nonpredictive cues affect neural responses associated with the conscious report of visual Gabor targets?** We addressed this question by examining brain responses to seen and unseen targets separately for valid and invalid nonpredictive cues. Source analysis of the MEG signal revealed that conscious perception was associated with right-lateralized frontoparietal feed-forward and feedback sweeps. Two clusters exceeding the threshold of randomization distribution under H0 emerged for the seen vs unseen comparison (both  $ps < 0.001$ ) in the time window of 400 - 800ms after cue onset. The first cluster was in the right hemisphere, the second in the left hemisphere. Both clusters started in the occipital cortex and afterwards extended to the frontoparietal network and temporal regions, bilaterally (see **Fig 3**). The differences for the main effects of *Validity* (valid, invalid), for the main effect of *Visual Field* (left, right), and for the interactions did not reach statistical significance. Control analyses showed that there was no significant difference between the number of MEG trials for left- and right-sided targets (left visual field, mean  $\pm$  SD: 235.39  $\pm$  32.49; right visual field, 235.5  $\pm$  30.02; Wilcoxon signed-rank test = 85;  $p = 1$ ; Bayesian Wilcoxon signed-rank test  $BF_{10} = 0.57$ , with median posterior  $\delta = -0.05$ , 95% CI [-1.09, 0.96]).

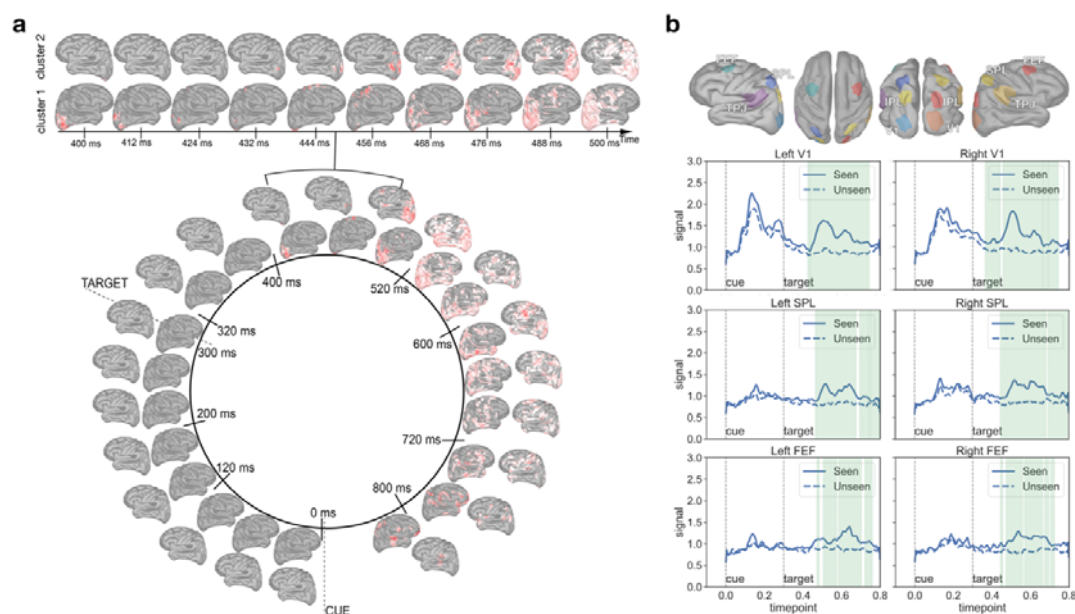

# RUNNING TITLE: Effects of Nonpredictive and Predictive Spatial Cues on Consciousness

**Figure 3. a.** When preceded by nonpredictive cues, seen targets evoked two clusters of brain activity compared to unseen targets. Cluster 1 occurred in the 400 - 800ms time window after cue onset, was lateralized to the right hemisphere, and encompassed a frontoparietal *feed-forward* and *feedback sweeps* (around 456ms), with subsequent diffusion to widespread bilateral activation. Cluster 2 occurred also in the 400 - 800ms time window after cue onset, but was lateralized to the left hemisphere, and encompassed a widespread brain activation. **b.** Average signal changes in the ROIs separately for the Seen (solid line) and Unseen (dashed line) condition. The area in green highlights the time interval in which cluster-corrected analysis showed a significant difference between the two signals.

***Does the validity of nonpredictive cues modulate the connectivity between ROIs associated with the conscious report of visual Gabor targets?*** To answer this question, we examined functional connectivity associated to seen and unseen targets separately for valid and invalid nonpredictive cues. Whole-trial (0 – 800ms) high-gamma band (60 - 90Hz) amplitude envelope correlation analyses conducted among attention-related ROIs (see **Table 1**) revealed a strong connectivity within visual ventral areas and between these areas and the anterior insular cortex (AIC), bilaterally for *Seen* compared to *Unseen* trials ( $p < .001$ , FDR corrected; **Fig 4a**). There was no evidence for a difference in connectivity between *Valid* and *Invalid* trials. Differences ( $ps < .005$ , FDR corrected; **Fig 4b** and **c**) emerged in the connectivity between *Seen Valid* and *Unseen Valid* trials across areas within the visual ventral stream as well as with the right inferior parietal lobule (IPL) and with the right AIC. There was also increased connectivity of the right AIC with areas in the visual ventral cortical stream and in *Seen Invalid* trials than *Unseen Invalid* trials.

# RUNNING TITLE: Effects of Nonpredictive and Predictive Spatial Cues on Consciousness

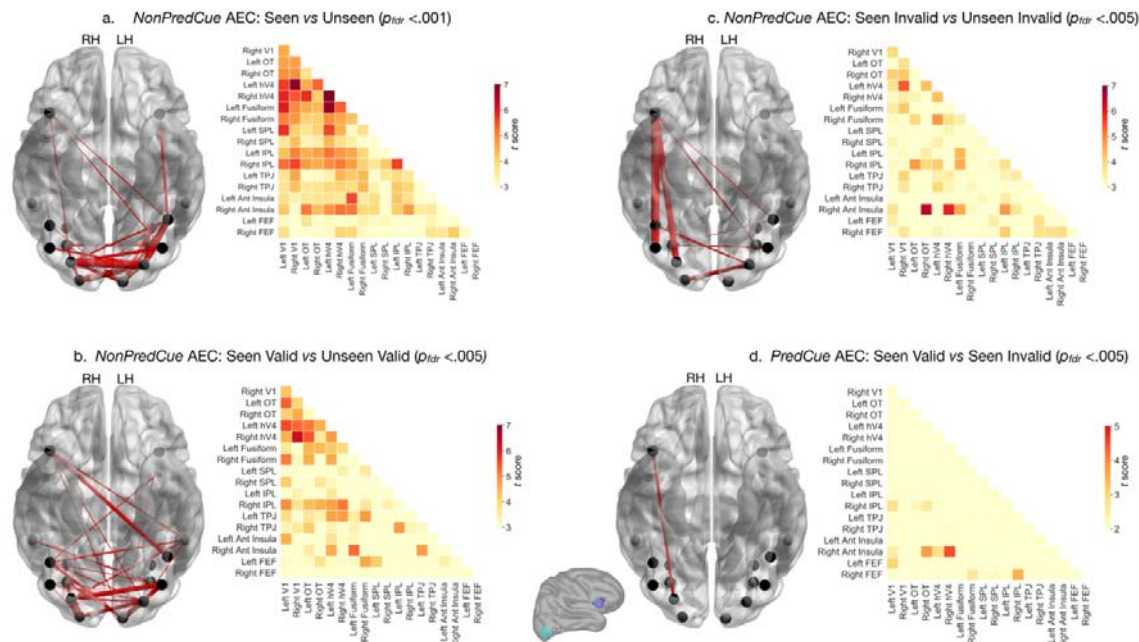

**Figure 4.** Pairwise functional connectivity (estimated using amplitude envelope correlation, AEC, of the whole duration of the trials – 0 to 800ms) between ROIs, with weighted edges denoting significant  $t$ -score values (overall  $p_s < .005$ , FDR corrected) obtained from the contrast between the conditions of interest. **a.** difference in AEC between *Seen* and *Unseen* trials in the nonpredictive cue (*NonPredCue*) experiment; **b.** difference in the AEC between *Seen Valid* and *Unseen Valid* in the *NonPredCue* experiment; **c.** difference in the AEC *Seen Invalid* and *Unseen Invalid* in the *NonPredCue* experiment; **d.** difference in the AEC *Seen Valid* and *Seen Invalid* in the predictive cue (*PredCue*) experiment.

Thus, the validity of nonpredictive cues modulated participants' conscious reports of visual Gabors for both behavioral performance and MEG connectivity measures. Differences also emerged between seen and unseen trials that were not confined to the occipital lobe, but were quickly followed by frontoparietal activity (approximately 150ms after the target and 50ms after the occipital activation), and subsequently by a widespread activity that lasted to the end of the trial, and resembled the pattern described as the Global Neuronal Workspace (Mashour et al., 2020).

# RUNNING TITLE: Effects of Nonpredictive and Predictive Spatial Cues on Consciousness

***Does the validity of predictive cues affect participants' response to visual Gabor targets?*** To address this issue, we examined behavioral responses to seen and unseen targets separately for valid and invalid predictive cues. As did nonpredictive cues, also valid predictive cues, compared to invalid predictive cues, lowered the response criterion (mean  $\pm$  SD valid:  $(0.85 \pm 0.28; 1.26 \pm 0.15; (t(13) = -6.37; p < .001)$ , because participants adopted a more liberal response threshold in the valid cue condition, and increased the percentage of detected targets (mean  $\pm$  SD valid:  $54.11 \% \pm 7.13\%$ ; invalid:  $43.33 \pm 5.14\%$ ;  $t(13) = 8.06; p < .001$ ). However, *sensitivity* ( $d'$ ) was greater for invalid trials ( $2.20 \pm 0.33$ ) than for valid trials ( $1.91 \pm 0.54$ ) ( $t(13) = -2.29; p < .05$ ) (see **Fig 2**). These results did not depend on possible differences between the thresholds established separately for valid and invalid trials cue trials during the calibration session (valid trials:  $59.21$ ; invalid trials:  $60.79$ ;  $t < 1$ ). Unexpectedly, right-sided targets evoked more correct responses than left-sided ones (right visual field, mean  $\pm$  SD:  $220.21 \pm 35.42$ ; left visual field,  $194.72 \pm 21.89$ ; Wilcoxon signed-rank test =  $6.00$ ;  $p < .01$ ; Bayesian Wilcoxon signed-rank test  $BF_{10} = 4.06$ , with median posterior  $\delta = -1.19$ , 95% CI  $[-2.51, 0.01]$ ).

Results of the ANOVA conducted on Accuracy percentages to the discrimination task (after ensuring that these percentages followed a normal distribution by using the Kolmogorov-Smirnov and the Shapiro Wilk tests for normality) are shown in **Fig 2f**. There was a main effect of the factor *Consciousness* ( $F_{(1,13)} = 31.62; p < .0001; \eta^2 = .71$ ), because participants were more accurate for *Seen* trials ( $72.87 \pm 15.2\%$ ) than for *Unseen* ( $49.71 \pm 5.9\%$ ) trials. No other effect or interaction reached significance, except for the interactions between *Consciousness* and *Validity* ( $F_{(1,13)} = 11.9; p < .01; \eta^2 = .48$ ) and between *Visual Field* and *Validity* ( $F_{(1,13)} = 8.89; p < .05; \eta^2 = .41$ ). Pairwise comparisons showed that the difference between valid and invalid trials was significant for the seen trials (valid:  $74.88 \pm 14.41\%$ ; invalid:  $70.86 \pm 16.14\%$ ;  $p < .01$ ), but not for the unseen trials (valid:  $48.91 \pm 5.13\%$ ;

# RUNNING TITLE: Effects of Nonpredictive and Predictive Spatial Cues on Consciousness

invalid  $50.51 \pm 6.52\%$ ;  $p = .14$ ). Participants detected more validly cued targets than invalidly cued targets in the right visual field (valid:  $64.24 \pm 9.92\%$ , invalid:  $60.08 \pm 12.26\%$ ,  $p < .01$ ), but not in the left visual field (valid:  $59.56 \pm 9.62\%$ ; invalid:  $61.29 \pm 10.04\%$   $p = .21$ ).

Results of the ANOVA conducted on the RTs (see **Fig 2g**) showed that participants responded slower to *Seen* targets ( $1048 \pm 171\text{ms}$ ) than to *Unseen* ones ( $640 \pm 259\text{ms}$ ;  $F_{(1,13)} = 28.91$ ;  $p < .0001$ ;  $\eta^2 = .69$ ). The main effects of *Visual Field* and *Validity* did not reach significance (both  $F_s < 1$ ). *Consciousness* interacted with *Visual Field* ( $F_{(1,13)} = 5.08$ ;  $p < .05$ ;  $\eta^2 = .28$ ), because the seen/unseen difference was greater for left-sided targets (seen:  $1,055 \pm 168\text{ms}$ ; unseen:  $624 \pm 249\text{ms}$ ;  $p < .001$ ) than for right-sided targets (seen:  $1,040 \pm 177$ ; unseen:  $656 \pm 272$ ;  $p < .001$ ).

***Does the validity of predictive cues affect neural responses associated with the conscious report of visual Gabor targets?*** We addressed this question by examining brain responses to seen and unseen targets separately for valid and invalid predictive cues. Similar to the experiment with nonpredictive cues, two clusters exceeding the threshold of randomization distribution under  $H_0$  emerged for the seen vs unseen comparison ( $ps < 0.001$ ), both in the time window of 460 - 760ms after cue onset. The first cluster was lateralized to the right hemisphere, the second was lateralized to the left hemisphere. Both started in the occipital cortex and then spread to the parieto-temporal regions, without any evidence of involvement of prefrontal regions. *Consciousness* interacted with *Validity*. Four clusters exceeding the threshold of randomization distribution under  $H_0$  were found for the interaction term ((seen valid minus unseen valid) minus (seen invalid minus unseen invalid)). The first cluster ( $p < 0.001$ ) occurred in the 100 - 150ms time window after cue onset, and was lateralized to the left visual cortex; the second cluster ( $p < 0.05$ ), was also lateralized to the left visual cortex and left IPL, in the 300 - 380ms time window after cue onset; the third cluster ( $p < 0.05$ ) occurred in the inferior temporal lobe of the right hemisphere and spanned across the time



# RUNNING TITLE: Effects of Nonpredictive and Predictive Spatial Cues on Consciousness

454 window of 550 and 600ms after cue onset; the forth cluster ( $p < 0.05$ ) was localized in the left  
 455 precuneus, extending into the left posterior cingulate cortex and spanned across the time  
 456 window of 580 and 600ms after cue onset. **Fig 5** displays the follow-up analysis conducted in  
 457 the valid *vs* invalid comparison for the seen condition only (seen valid *minus* seen invalid).  
 458 Three clusters exceeded the threshold of randomization distribution under H0. A first cluster  
 459 ( $p < 0.001$ ) was lateralized to the left hemisphere and occurred in the 50 - 400ms time  
 460 window after cue onset, spanning across visual cortex, to the parietal cortex (around 100ms  
 461 post-cue), prefrontal cortex (around 150ms post-cue), and temporoparietal cortex. A second  
 462 cluster ( $p < 0.05$ ), occurred later, as a right-hemisphere occipito-parietal activation around  
 463 200ms post-cue, and then substantially resembled the activity found in the first cluster,  
 464 spanning across the frontoparietal cortex (around 240ms post-cue), and temporoparietal  
 465 cortex (around 280ms post-cue). The third cluster ( $p < 0.05$ ) was lateralized to the left visual  
 466 cortex and included middle- and infero-temporal areas, the inferior frontal gyrus (around  
 467 470ms post-cue), the left frontal eye fields (524ms post-cue) and then temporoparietal,  
 468 inferior parietal, and inferior temporal areas.

469 Control analyses showed that there was no significant difference between the number  
 470 of MEG trials for left- and right-sided targets (left visual field mean  $\pm$  SD:  $265.43 \pm 21.16$ ;  
 471 right visual field; mean  $\pm$  SD:  $266.79 \pm 26.91$ ; Wilcoxon signed-rank test = 48.5;  $p = 0.83$ ;  
 472 Bayesian Wilcoxon signed-rank test  $BF_{10} = 0.58$ , with median posterior  $\delta = -0.073$ , 95% CI [-  
 473 1.11, 0.94]).

# RUNNING TITLE: Effects of Nonpredictive and Predictive Spatial Cues on Consciousness

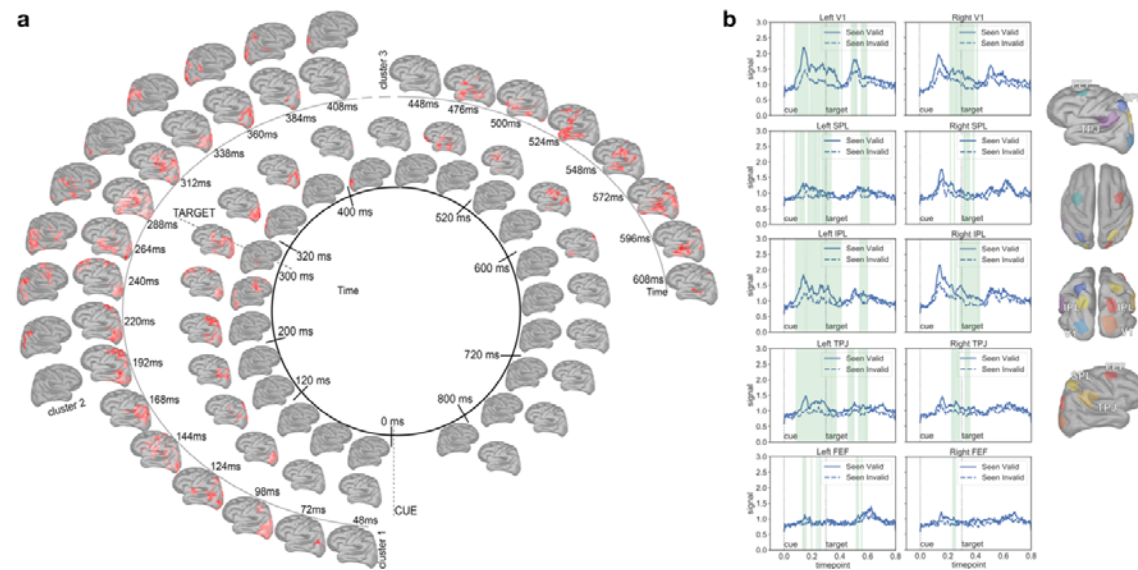

**Figure 5.** When preceded by valid predictive cues, seen targets evoked three clusters of brain activity, compared to invalidly cued targets. **a)** Cluster 1 occurred in the 50-400ms time window after cue onset and was lateralized to the left hemisphere ( $p < 0.001$ ); Cluster 2 occurred in 200ms time-window after cue onset and was lateralized to the right hemisphere ( $p < 0.05$ ); Cluster 3: occurred 470ms after cue onset and lateralized to the left hemisphere. The same valid-invalid comparison for unseen targets did not reveal any significant cluster. **b)** average signal changes in the ROIs separately for the Seen Valid (solid line) and Seen Invalid (dashed line) condition. The area in green highlights the time interval in which cluster-corrected analysis showed a significant difference between the two signals.

***Does the validity of predictive cues modulate the connectivity between ROIs associated with the conscious report of visual Gabor targets?*** We examined functional connectivity associated to seen and unseen targets separately for valid and invalid predictive cues. High-gamma band (60 - 90Hz) amplitude envelope correlation analyses conducted on the ROIs revealed increased connectivity between the right AIC and the right temporo-occipital area for *Seen Valid* vs *Seen Invalid* trials (see Fig 4d). The comparisons between connectivity patterns in the *Seen Valid* vs *Unseen Valid* and the comparison between connectivity patterns in the *Seen Invalid* vs *Unseen Invalid* did not yield statistically significant results.



# RUNNING TITLE: Effects of Nonpredictive and Predictive Spatial Cues on Consciousness

Thus, similar to nonpredictive cues, also the validity of predictive cues modulated participants' conscious reports of visual Gabors for both behavioral performance and neural activity measures. Differences between seen and unseen trials with predictive cues emerged in the post-target time period, but these were delayed in time compared to the same contrast with nonpredictive cues. Bilateral activity started in the visual cortex, around 160ms after the target, and was followed by mainly temporo-parietal activity, with prefrontal activity arising only later in time (almost 300ms after the target). The interaction between attention and consciousness showed four clusters of activation located in occipito-temporal regions that spanned across both the cue-target and the post-target periods, possibly showing the *site* of attentional modulation (Posner and Driver, 1992) rather than the *source* of it (Bressler et al., 2008; Liu et al., 2016). The modulation produced by predictive cues on visual awareness was also evident in the contrast between the functional connectivity patterns in valid and invalid trials for seen targets, which again showed correlated activity in AIC and areas in the ventral visual stream, bilaterally.

## **Cross-experiment comparison: different effects of nonpredictive and predictive cues on visual conscious perception.**

Did nonpredictive and predictive cues produce different effects on brain activity and connectivity? Seen targets preceded by a nonpredictive cue evoked a significant cluster (Fig 6), occurring in the 210 - 300ms time window after cue onset, lateralized to the right hemisphere, and encompassing an early activation in the middle and inferior frontal gyri, the superior frontal gyrus and the temporoparietal junction (mainly located in the angular gyrus), with subsequent diffusion to occipitotemporal regions (cluster-corrected Welch's *t* test conducted in the cue-target period (0 – 300 ms),  $p < .02$ ).

# RUNNING TITLE: Effects of Nonpredictive and Predictive Spatial Cues on Consciousness

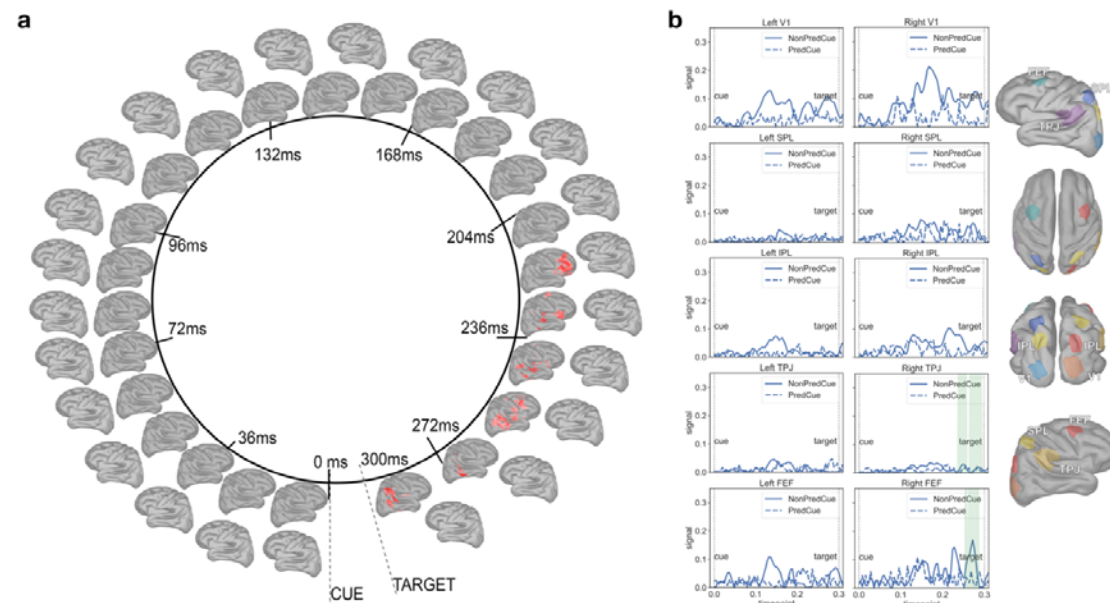

**Figure 6.** MEG activity evoked by nonpredictive vs. predictive cues for Seen vs. Unseen targets in the cue-target period (0 – 300 ms). **a.** One right-hemispheric cluster emerged in the 210-300ms time window, and included the temporoparietal junction and the prefrontal cortex. **b.** Average signal changes in the ROIs separately for the experiments with nonpredictive cue (solid line) and with predictive cues (dashed line). The area in green highlights the time interval in which cluster-corrected analysis showed a significant difference between the two signals.

Whole-trial (0 – 800ms) high-gamma band (60-90Hz) pairwise functional connectivity analyses conducted among attention-related ROIs (see Table 1) revealed a stronger connectivity between the left TPJ and right fusiform gyrus ( $p < .01$ ), the left anterior insular cortex (AIC) and the left fusiform gyrus ( $p < .05$ ), and between the left superior parietal lobe (SPL) and the right IPL ( $p < .05$ ) for the seen minus unseen contrast with nonpredictive cues, as compared to same contrast with predictive cues.

## Discussion

# RUNNING TITLE: Effects of Nonpredictive and Predictive Spatial Cues on Consciousness

Our results establish the existence of interaction patterns between spatial attention and consciousness that vary based on the predictivity of the cue, and specify how attention modulates conscious perception. Altogether, the contributions of nonpredictive and predictive cues in improving target detection indicate that distinct spatiotemporal dynamics support the flexible allocation of attentional resources for near-threshold visual information to reach a conscious level of processing.

*Valid spatial cues influence conscious reports.* Both predictive and nonpredictive valid cues increased the proportion of correctly detected targets. These results align with behavioral evidence showing the modulation of orienting cues in increasing visual awareness (Ling and Carrasco, 2006; Liu et al., 2009; Chica et al., 2011b; Sergent et al., 2013; Botta et al., 2017; Vernet et al., 2019). However, only predictive cues improved performance on the discrimination task, while Chica et al. (2011b) found effects of both nonpredictive and predictive cues in a similar task. One important methodological difference between our study and the Chica et al. (2011b) study is that in the current experiments two supra-threshold Gabor patches were presented 500ms after the target to collect the discrimination response. This screen could have increased the perceptual difficulty of the task and therefore reduced or abolished the effects of nonpredictive cues (Kerzel et al., 2009). Unexpectedly, valid predictive cues decreased perceptual sensitivity. This result is at odds with previous observations of increased perceptual sensitivity (Chica et al., 2011b) and contrast sensitivity (Carrasco, 2018) at attended locations with predictive cues. Possible masking effects caused by the post-target display might explain our finding. Validly cued targets might have suffered interference from the preceding cue and the subsequent response Gabors, while invalid targets were only masked by the response Gabors. Facilitatory effects induced by peripheral cues are typically much larger for discrimination than for detection tasks (Lupianez et al., 1997; Lupianez et al., 2001; Chica et al., 2006). Consequently, the possible increased difficulty of

# RUNNING TITLE: Effects of Nonpredictive and Predictive Spatial Cues on Consciousness

detecting a near-threshold target, might have reduced the behavioral effects of spatial attention. Peripheral cues (whether nonpredictive or predictive) produced a shift in the response criterion towards a more liberal response in valid compared to invalid trials, indicating that orienting cues modulated decision-related processes in our setting.

*Distinct neural processes elicited by nonpredictive and predictive cues.* MEG results indicated distinct spatiotemporal dynamics across tasks, both at the source level and in the functional connectivity patterns. Nonpredictive cues elicited a greater activation of the right TPJ and right prefrontal cortex in the seen *minus* unseen contrast compared to predictive cues. This network is connected by the ventral branch of the superior longitudinal fasciculus (SLF III) (Thiebaut De Schotten et al., 2011), and involved in exogenous attention (Corbetta and Shulman, 2002; Chica et al., 2011a). Interestingly, comparison of brain activity elicited by nonpredictive *versus* predictive cues (irrespective of participants' responses), showed a right-hemispheric TPJ-prefrontal cluster. The reduced TPJ activity for predictive cues compared to nonpredictive cues is consistent with evidence of TPJ deactivation during endogenous orienting (Shulman et al., 2007; Doricchi et al., 2010). Moreover, the combination of spatial and temporal resolution of MEG results demonstrated that this reduced TPJ activation for predictive as compared to nonpredictive cue was preceded by deactivation of the prefrontal nodes of the SLF III network in the middle and inferior frontal gyri. The statistically higher frequency of valid trials in the predictive cue experiment than in the nonpredictive cue experiment might explain the occurrence of different preparatory states after cue presentation between the two experiments. This possibility may account for the absence of such effects in the task with nonpredictive cues, which did not induce any probabilistic expectations. Together with the behavioral validity effect occurring with predictive cues, this result suggests that cue predictivity enhances attentional modulation. Interestingly, while the occipital activation was bilateral, the IPL-TPJ activations lasted longer (by around 100ms)

# RUNNING TITLE: Effects of Nonpredictive and Predictive Spatial Cues on Consciousness

only in the right hemisphere, in line with abundant evidence on anatomical and functional asymmetries in frontoparietal attention networks favoring the right hemisphere (reviewed in Bartolomeo and Malkinson, 2019; see also Spagna et al., 2020b), and specifically with the role of the right TPJ in attentional orienting (Doricchi et al., 2010; Chica et al., 2014a), and in the processing of behaviorally relevant stimuli (Macaluso and Doricchi, 2013).

*Frontoparietal networks and visual awareness.* Dysfunction of SLF II and III networks in the right hemisphere is a typical finding in brain-damaged patients with left visual neglect, who have impaired awareness of left-sided events (Bartolomeo et al., 2012). The frontoparietal activity found with nonpredictive cues seems consistent with the *forward* and *backward sweeps* associated with the awareness of a visual target (Lamme, 2006), and suggests a role for exogenous attention in this process. The relationship of these forward/backward sweeps with behavioral changes in criterion, but not in sensitivity, might be consistent with the known role of frontoparietal networks in the activation of general processes, such as the alerting system (Périn et al., 2010; Chica et al., 2016a; Baria et al., 2017; Petersen et al., 2017; Podvalny et al., 2019). An interaction of nonpredictive cues with alerting is also supported by the functional connectivity analysis, which showed a role of the right AIC in differentiating seen vs. unseen trials separately for valid and invalid trials (see **Fig 6**). This result is consistent with evidence showing the critical role of the AIC in the production and maintenance of alertness, both in terms of BOLD response and of functional connectivity (Cai et al., 2014; Sadaghiani and D'Esposito, 2015; Chica et al., 2016a; Coste and Kleinschmidt, 2016; Han et al., 2019; Haupt et al., 2019). As a node of the SLF III network, the AIC may have an important role in signaling behaviorally relevant stimuli (Uddin, 2015).

In conclusion, four results of this study are broadly consistent with the gateway hypothesis (Posner, 1994), and demonstrate how the interaction between attention and visual

# RUNNING TITLE: Effects of Nonpredictive and Predictive Spatial Cues on Consciousness

conscious processing heavily depends on the specific attentional component manipulated. First, both predictive and nonpredictive visual cues modulated behavioral performance in the form of a shift towards a more liberal response criterion. Second, peripheral predictive cues were able to modulate visual conscious processing, as shown by the interaction with response accuracy, in line with previous evidence (Chica et al., 2013a). Third, predictive cues also interacted with consciousness at the neural level, and induced increased activity in visual areas, possibly related to the site of attentional modulation. Last, high-gamma band functional connectivity patterns involving the AIC and the visual areas for seen trials differed across task conditions, with valid cues inducing greater modulation of the visual areas compared to invalid cues.

It remains possible that attention is required for conscious processing only when there is some competition between the stimuli to be resolved (Tsuchiya and Koch, 2014; Davidson et al., 2018), which was the case in our setting with two possible target locations. Alternatively, even an isolated stimulus might need some attentional capture to be consciously processed. Evidence from visual mental imagery studies, showing the implication of frontoparietal attention networks within the conscious imagination of an object in its absence, and thus without any competition (Spagna et al., 2020a), might support this possibility, which needs to be empirically assessed. Altogether, the comparison of the spatiotemporal dynamics underlying the interaction between nonpredictive and predictive attention with consciousness shown here confirmed that these distinct contributions span across behavioral, neural, and connectivity measures, and underlines the role of the right AIC in visual awareness.

RUNNING TITLE: Effects of Nonpredictive and Predictive Spatial Cues on Consciousness

# **Author Contributions**

D.B., A.B.C., and P.B. designed the experiments; A.S., D.B., and Z.R. analyzed the data. All authors discussed the results and contributed to writing up the report. Behavioral data and the code to reproduce the figures (built using Python on Spyder) can be found on the [GitHub page of A.S.](#) We thank Fabrizio Doricchi, Isabella Elaine Rosario, and Catherine Tallon-Baudry for providing extensive comments on this manuscript.

RUNNING TITLE: Effects of Nonpredictive and Predictive Spatial Cues on Consciousness

636

### **Conflict of Interest Statement**

637 The authors report no conflict of interest.

638



# RUNNING TITLE: Effects of Nonpredictive and Predictive Spatial Cues on Consciousness

## **Funding**

Funded by an ICM fellowship to A.S., by project eraNET-NEURON 2009 “BEYONDVIS” to D.J.B and P.B.. P.B. is also supported by the *Agence Nationale de la Recherche* through ANR-16-CE37-0005 and ANR-10-IAIHU-06, and by the *Fondation pour la Recherche sur les AVC* through FR-AVC-017.

# RUNNING TITLE: Effects of Nonpredictive and Predictive Spatial Cues on Consciousness

## References

- Baillet S (2017) Magnetoencephalography for brain electrophysiology and imaging. *Nature neuroscience* 20:327.
- Baria AT, Maniscalco B, He BJ (2017) Initial-state-dependent, robust, transient neural dynamics encode conscious visual perception. *PLoS Comput Biol* 13:e1005806.
- Bartolomeo P, Malkinson TS (2019) Hemispheric lateralization of attention processes in the human brain. *Current opinion in psychology* 29:90-96.
- Bartolomeo P, Decaix C, Siéroff E (2007) The phenomenology of endogenous orienting. *Consciousness and Cognition* 16:144-161.
- Bartolomeo P, Thiebaut De Schotten M, Chica AB (2012) Brain networks of visuospatial attention and their disruption in visual neglect. *Frontiers in human neuroscience* 6:110.
- Botta F, Ródenas E, Chica AB (2017) Target bottom-up strength determines the extent of attentional modulations on conscious perception. *Experimental brain research* 235:2109-2124.
- Bressler SL, Tang W, Sylvester CM, Shulman GL, Corbetta M (2008) Top-down control of human visual cortex by frontal and parietal cortex in anticipatory visual spatial attention. *Journal of Neuroscience* 28:10056-10061.
- Brookes MJ, Woolrich MW, Barnes GR (2012) Measuring functional connectivity in MEG: a multivariate approach insensitive to linear source leakage. *Neuroimage* 63:910-920.
- Cai W, Ryali S, Chen T, Li C-SR, Menon V (2014) Dissociable roles of right inferior frontal cortex and anterior insula in inhibitory control: evidence from intrinsic and task-related functional parcellation, connectivity, and response profile analyses across multiple datasets. *Journal of Neuroscience* 34:14652-14667.
- Carrasco M (2018) How visual spatial attention alters perception. *Cognitive processing* 19:77-88.
- Chica AB, Lupiáñez J, Bartolomeo P (2006) Dissociating inhibition of return from endogenous orienting of spatial attention: Evidence from detection and discrimination tasks. *Cognitive neuropsychology* 23:1015-1034.
- Chica AB, Bartolomeo P, Valero-Cabré A (2011a) Dorsal and ventral parietal contributions to spatial orienting in the human brain. *Journal of Neuroscience* 31:8143-8149.
- Chica AB, Bartolomeo P, Lupianez J (2013a) Two cognitive and neural systems for endogenous and exogenous spatial attention. *Behav Brain Res* 237:107-123.
- Chica AB, Bartolomeo P, Lupiáñez J (2013b) Two cognitive and neural systems for endogenous and exogenous spatial attention. *Behavioural brain research* 237:107-123.
- Chica AB, Bourgeois A, Bartolomeo P (2014a) On the role of the ventral attention system in spatial orienting. *Frontiers in Human Neuroscience* 8:235.
- Chica AB, Paz-Alonso PM, Valero-Cabre A, Bartolomeo P (2013c) Neural bases of the interactions between spatial attention and conscious perception. *Cerebral Cortex* 23:1269-1279.
- Chica AB, Martín-Arévalo E, Botta F, Lupiáñez J (2014b) The Spatial Orienting paradigm: How to design and interpret spatial attention experiments. *Neuroscience & Biobehavioral Reviews* 40:35-51.
- Chica AB, Bayle DJ, Botta F, Bartolomeo P, Paz-Alonso PM (2016a) Interactions between phasic alerting and consciousness in the fronto-striatal network. *Sci Rep* 6.

# RUNNING TITLE: Effects of Nonpredictive and Predictive Spatial Cues on Consciousness

- 695 Chica AB, Bayle DJ, Botta F, Bartolomeo P, Paz-Alonso PM (2016b) Interactions between  
696 phasic alerting and consciousness in the fronto-striatal network. *Scientific reports*  
697 6:31868.
- 698 Chica AB, Lasaponara S, Chanes L, Valero-Cabré A, Doricchi F, Lupiáñez J, Bartolomeo P  
699 (2011b) Spatial attention and conscious perception: the role of endogenous and  
700 exogenous orienting. *Attention, Perception, & Psychophysics* 73:1065-1081.
- 701 Colclough GL, Brookes MJ, Smith SM, Woolrich MW (2015) A symmetric multivariate leakage  
702 correction for MEG connectomes. *Neuroimage* 117:439-448.
- 703 Corbetta M, Shulman GL (2002) Control of goal-directed and stimulus-driven attention in the  
704 brain. *Nature reviews neuroscience* 3:201-215.
- 705 Coste CP, Kleinschmidt A (2016) Cingulo-opercular network activity maintains alertness.  
706 *Neuroimage* 128:264-272.
- 707 Davidson MJ, Alais D, van Boxtel JJ, Tsuchiya N (2018) Attention periodically samples  
708 competing stimuli during binocular rivalry. *Elife* 7:e40868.
- 709 Dehaene S, Changeux J-P, Naccache L, Sackur J, Sergent C (2006) Conscious, preconscious,  
710 and subliminal processing: a testable taxonomy. *Trends Cogn Sci* 10:204-211.
- 711 Doricchi F, Macci E, Silvetti M, Macaluso E (2010) Neural correlates of the spatial and  
712 expectancy components of endogenous and stimulus-driven orienting of attention in  
713 the Posner task. *Cerebral Cortex* 20:1574-1585.
- 714 Fan J, McCandliss BD, Sommer T, Raz A, Posner MI (2002) Testing the efficiency and  
715 independence of attentional networks. *Journal of cognitive neuroscience* 14:340-347.
- 716 Fan J, McCandliss BD, Fossella J, Flombaum JI, Posner MI (2005) The activation of attentional  
717 networks. *Neuroimage* 26:471-479.
- 718 Fiebelkorn IC, Kastner S (2019) A rhythmic theory of attention. *Trends in cognitive sciences*  
719 23:87-101.
- 720 Fischl B (2012) FreeSurfer. *Neuroimage* 62:774-781.
- 721 Funes MJ, Lupiáñez J, Milliken B (2007) Separate mechanisms recruited by exogenous and  
722 endogenous spatial cues: Evidence from a spatial Stroop paradigm. *Journal of*  
723 *Experimental Psychology: Human Perception and Performance* 33:348.
- 724 Han SW, Eaton HP, Marois R (2019) Functional fractionation of the Cingulo-opercular  
725 network: alerting insula and updating cingulate. *Cerebral Cortex* 29:2624-2638.
- 726 Haupt M, Ruiz-Rizzo AL, Sorg C, Finke K (2019) Phasic alerting effects on visual processing  
727 speed are associated with intrinsic functional connectivity in the cingulo-opercular  
728 network. *NeuroImage* 196:216-226.
- 729 Kentridge RW, Nijboer TC, Heywood CA (2008) Attended but unseen: Visual attention is not  
730 sufficient for visual awareness. *Neuropsychologia* 46:864-869.
- 731 Kerzel D, Zarian L, Souto D (2009) Involuntary cueing effects on accuracy measures: Stimulus  
732 and task dependence. *Journal of Vision* 9:16-16.
- 733 Koch C, Tsuchiya N (2007) Attention and consciousness: two distinct brain processes. *Trends*  
734 *in cognitive sciences* 11:16-22.
- 735 Lamme VA (2006) Towards a true neural stance on consciousness. *Trends in cognitive*  
736 *sciences* 10:494-501.
- 737 Ling S, Carrasco M (2006) Sustained and transient covert attention enhance the signal via  
738 different contrast response functions. *Vision research* 46:1210-1220.
- 739 Liu T, Abrams J, Carrasco M (2009) Voluntary attention enhances contrast appearance.  
740 *Psychological science* 20:354-362.

# RUNNING TITLE: Effects of Nonpredictive and Predictive Spatial Cues on Consciousness

741 Liu Y, Bengson J, Huang H, Mangun GR, Ding M (2016) Top-down modulation of neural  
742 activity in anticipatory visual attention: control mechanisms revealed by  
743 simultaneous EEG-fMRI. *Cerebral Cortex* 26:517-529.

744 Lupiáñez J, Milán EG, Tornay FJ, Madrid E, Tudela P (1997) Does IOR occur in discrimination  
745 tasks? Yes, it does, but later. *Perception & psychophysics* 59:1241-1254.

746 Lupiáñez J, Milliken B, Solano C, Weaver B, Tipper SP (2001) On the strategic modulation of  
747 the time course of facilitation and inhibition of return. *The Quarterly Journal of*  
748 *Experimental Psychology: Section A* 54:753-773.

749 Macaluso E, Doricchi F (2013) Attention and predictions: control of spatial attention beyond  
750 the endogenous-exogenous dichotomy. *Frontiers in human neuroscience* 7:685.

751 Magazzini L, Singh KD (2018) Spatial attention modulates visual gamma oscillations across  
752 the human ventral stream. *Neuroimage* 166:219-229.

753 Maris E, Oostenveld R (2007) Nonparametric statistical testing of EEG-and MEG-data. *Journal*  
754 *of neuroscience methods* 164:177-190.

755 Mashour GA, Roelfsema P, Changeux J-P, Dehaene S (2020) Conscious processing and the  
756 global neuronal workspace hypothesis. *Neuron* 105:776-798.

757 Oostenveld R, Fries P, Maris E, Schoffelen J-M (2011) FieldTrip: open source software for  
758 advanced analysis of MEG, EEG, and invasive electrophysiological data. *Comput Intell*  
759 *Neurosci* 2011:1.

760 Périn B, Godefroy O, Fall S, de Marco G (2010) Alertness in young healthy subjects: an fMRI  
761 study of brain region interactivity enhanced by a warning signal. *Brain and cognition*  
762 72:271-281.

763 Petersen A, Petersen AH, Bundesen C, Vangkilde S, Habekost T (2017) The effect of phasic  
764 auditory alerting on visual perception. *Cognition* 165:73-81.

765 Podvalny E, Flounders MW, King LE, Holroyd T, He BJ (2019) A dual role of prestimulus  
766 spontaneous neural activity in visual object recognition. *Nature communications*  
767 10:1-13.

768 Portin K, Vanni S, Virsu V, Hari R (1999) Stronger occipital cortical activation to lower than  
769 upper visual field stimuli. *Neuromagnetic recordings. Exp Brain Res* 124:287-294.

770 Posner MI (1980) Orienting of attention. *Quarterly journal of experimental psychology* 32:3-  
771 25.

772 Posner MI (1994) Attention: the mechanisms of consciousness. *Proceedings of the National*  
773 *Academy of Sciences* 91:7398-7403.

774 Posner MI, Driver J (1992) The neurobiology of selective attention. *Current opinion in*  
775 *neurobiology* 2:165-169.

776 Sadaghiani S, D'Esposito M (2015) Functional characterization of the cingulo-opercular  
777 network in the maintenance of tonic alertness. *Cerebral Cortex* 25:2763-2773.

778 Sergent C, Wyart V, Babo-Rebelo M, Cohen L, Naccache L, Tallon-Baudry C (2013) Cueing  
779 attention after the stimulus is gone can retrospectively trigger conscious perception.  
780 *Current biology* 23:150-155.

781 Shulman GL, Astafiev SV, McAvoy MP, d'Avossa G, Corbetta M (2007) Right TPJ deactivation  
782 during visual search: functional significance and support for a filter hypothesis.  
783 *Cerebral Cortex* 17:2625-2633.

784 Snodgrass JG, Corwin J (1988) Pragmatics of measuring recognition memory: applications to  
785 dementia and amnesia. *J Exp Psychol Gen* 117:34.

786 Spagna A, Mackie M-A, Fan J (2015) Supramodal executive control of attention. *Frontiers in*  
787 *psychology* 6:65.

# RUNNING TITLE: Effects of Nonpredictive and Predictive Spatial Cues on Consciousness

- 788 Spagna A, Hajhajate D, Liu J, Bartolomeo P (2020a) Visual mental imagery engages the left
- 789 fusiform gyrus, but not the early visual cortex: a meta-analysis of neuroimaging
- 790 evidence. *BioRxiv*.
- 791 Spagna A, Kim TH, Wu T, Fan J (2020b) Right hemisphere superiority for executive control of
- 792 attention. *Cortex* 122:263-276.
- 793 Tadel F, Baillet S, Mosher JC, Pantazis D, Leahy RM (2011) Brainstorm: a user-friendly
- 794 application for MEG/EEG analysis. *Comput Intell Neurosci* 2011:879716.
- 795 Tadel F, Bock EA, Niso G, Mosher JC, Cousineau M, Pantazis D, Leahy RM, Baillet S (2019)
- 796 MEG/EEG group analysis with Brainstorm. *Front Neurosci* 13:76.
- 797 Tallon-Baudry C (2012) On the neural mechanisms subserving consciousness and attention.
- 798 *Front Psychol* 2:397.
- 799 Tallon-Baudry C, Bertrand O, Hénaff M-A, Isnard J, Fischer C (2005) Attention modulates
- 800 gamma-band oscillations differently in the human lateral occipital cortex and
- 801 fusiform gyrus. *Cerebral cortex* 15:654-662.
- 802 Taulu S, Simola J (2006) Spatiotemporal signal space separation method for rejecting nearby
- 803 interference in MEG measurements. *Phys Med Biol* 51:1759.
- 804 Thiebaut De Schotten M, Dell'Acqua F, Forkel S, Simmons A, Vergani F, Murphy DG, Catani M
- 805 (2011) A lateralized brain network for visuo-spatial attention. *Nature Precedings*:1-1.
- 806 Tsuchiya N, Koch C (2014) On the relationship between consciousness and attention: MIT
- 807 Press.
- 808 Tsuchiya N, Koch C (2016) The relationship between consciousness and top-down attention.
- 809 In: *The neurology of consciousness*, pp 71-91: Elsevier.
- 810 Uddin LQ (2015) Salience processing and insular cortical function and dysfunction. *Nature*
- 811 *reviews neuroscience* 16:55-61.
- 812 Van Boxtel JJ, Tsuchiya N, Koch C (2010) Opposing effects of attention and consciousness on
- 813 afterimages. *Proceedings of the National Academy of Sciences* 107:8883-8888.
- 814 Vernet M, Japee S, Lokey S, Ahmed S, Zachariou V, Ungerleider LG (2019) Endogenous
- 815 visuospatial attention increases visual awareness independent of visual
- 816 discrimination sensitivity. *Neuropsychologia* 128:297-304.
- 817 Wyart V, Tallon-Baudry C (2008) Neural dissociation between visual awareness and spatial
- 818 attention. *J Neurosci* 28:2667-2679.
- 819 Xuan B, Mackie M-A, Spagna A, Wu T, Tian Y, Hof PR, Fan J (2016) The activation of
- 820 interactive attentional networks. *NeuroImage* 129:308-319.

# RUNNING TITLE: Effects of Nonpredictive and Predictive Spatial Cues on Consciousness

823

## Tables

**Table 1.** MNI Coordinates and size of the area (in cm<sup>2</sup>) used in the connectivity analyses.

| ROI              | x   | y   | z   | area  |
|------------------|-----|-----|-----|-------|
| Left V1          | -26 | -99 | 7   | 12.63 |
| Right V1         | 25  | 99  | 9   | 17.03 |
| Left OT          | -45 | -88 | -10 | 12.69 |
| Right OT         | 45  | -80 | -17 | 12.67 |
| Left hV4         | -25 | -95 | -20 | 10.78 |
| Right hV4        | 16  | -95 | -16 | 7.62  |
| Left Fusiform    | -34 | -50 | -21 | 9.82  |
| Right Fusiform   | 34  | -50 | -21 | 9.59  |
| Left SPL         | -28 | -60 | 57  | 16.64 |
| Right SPL        | 21  | -39 | 62  | 16.17 |
| Left IPL         | -27 | -82 | 45  | 16.65 |
| Right IPL        | 31  | -82 | 43  | 16.96 |
| Left TPJ         | -62 | -55 | 17  | 42.86 |
| Right TPJ        | 67  | -38 | 20  | 34.75 |
| Left Ant Insula  | -35 | 21  | 3   | 13.5  |
| Right Ant Insula | 35  | 21  | 3   | 13.82 |
| Left FEF         | -47 | 14  | 52  | 14.17 |
| Right FEF        | 47  | 14  | 53  | 12.28 |

824 Note: ROIs were selected based on results from previous studies (Corbetta and Shulman,  
825 2002; Fan et al., 2005; Tallon-Baudry et al., 2005; Bressler et al., 2008; Chica et al., 2013c;  
826 Chica et al., 2016b; Xuan et al., 2016) showing the involvement of these areas in attention-  
827 related processes. In addition, areas of the ventral visual stream were also added to the ROI  
828 analyses to examine the potential modulation of the activity in attention network regions on

RUNNING TITLE: Effects of Nonpredictive and Predictive Spatial Cues on Consciousness

829 early and late visual areas. Seed vertices of the ROIs are reported in MNI coordinates, and the

830 area of the ROI is reported in cm<sup>2</sup>.

831

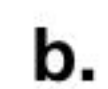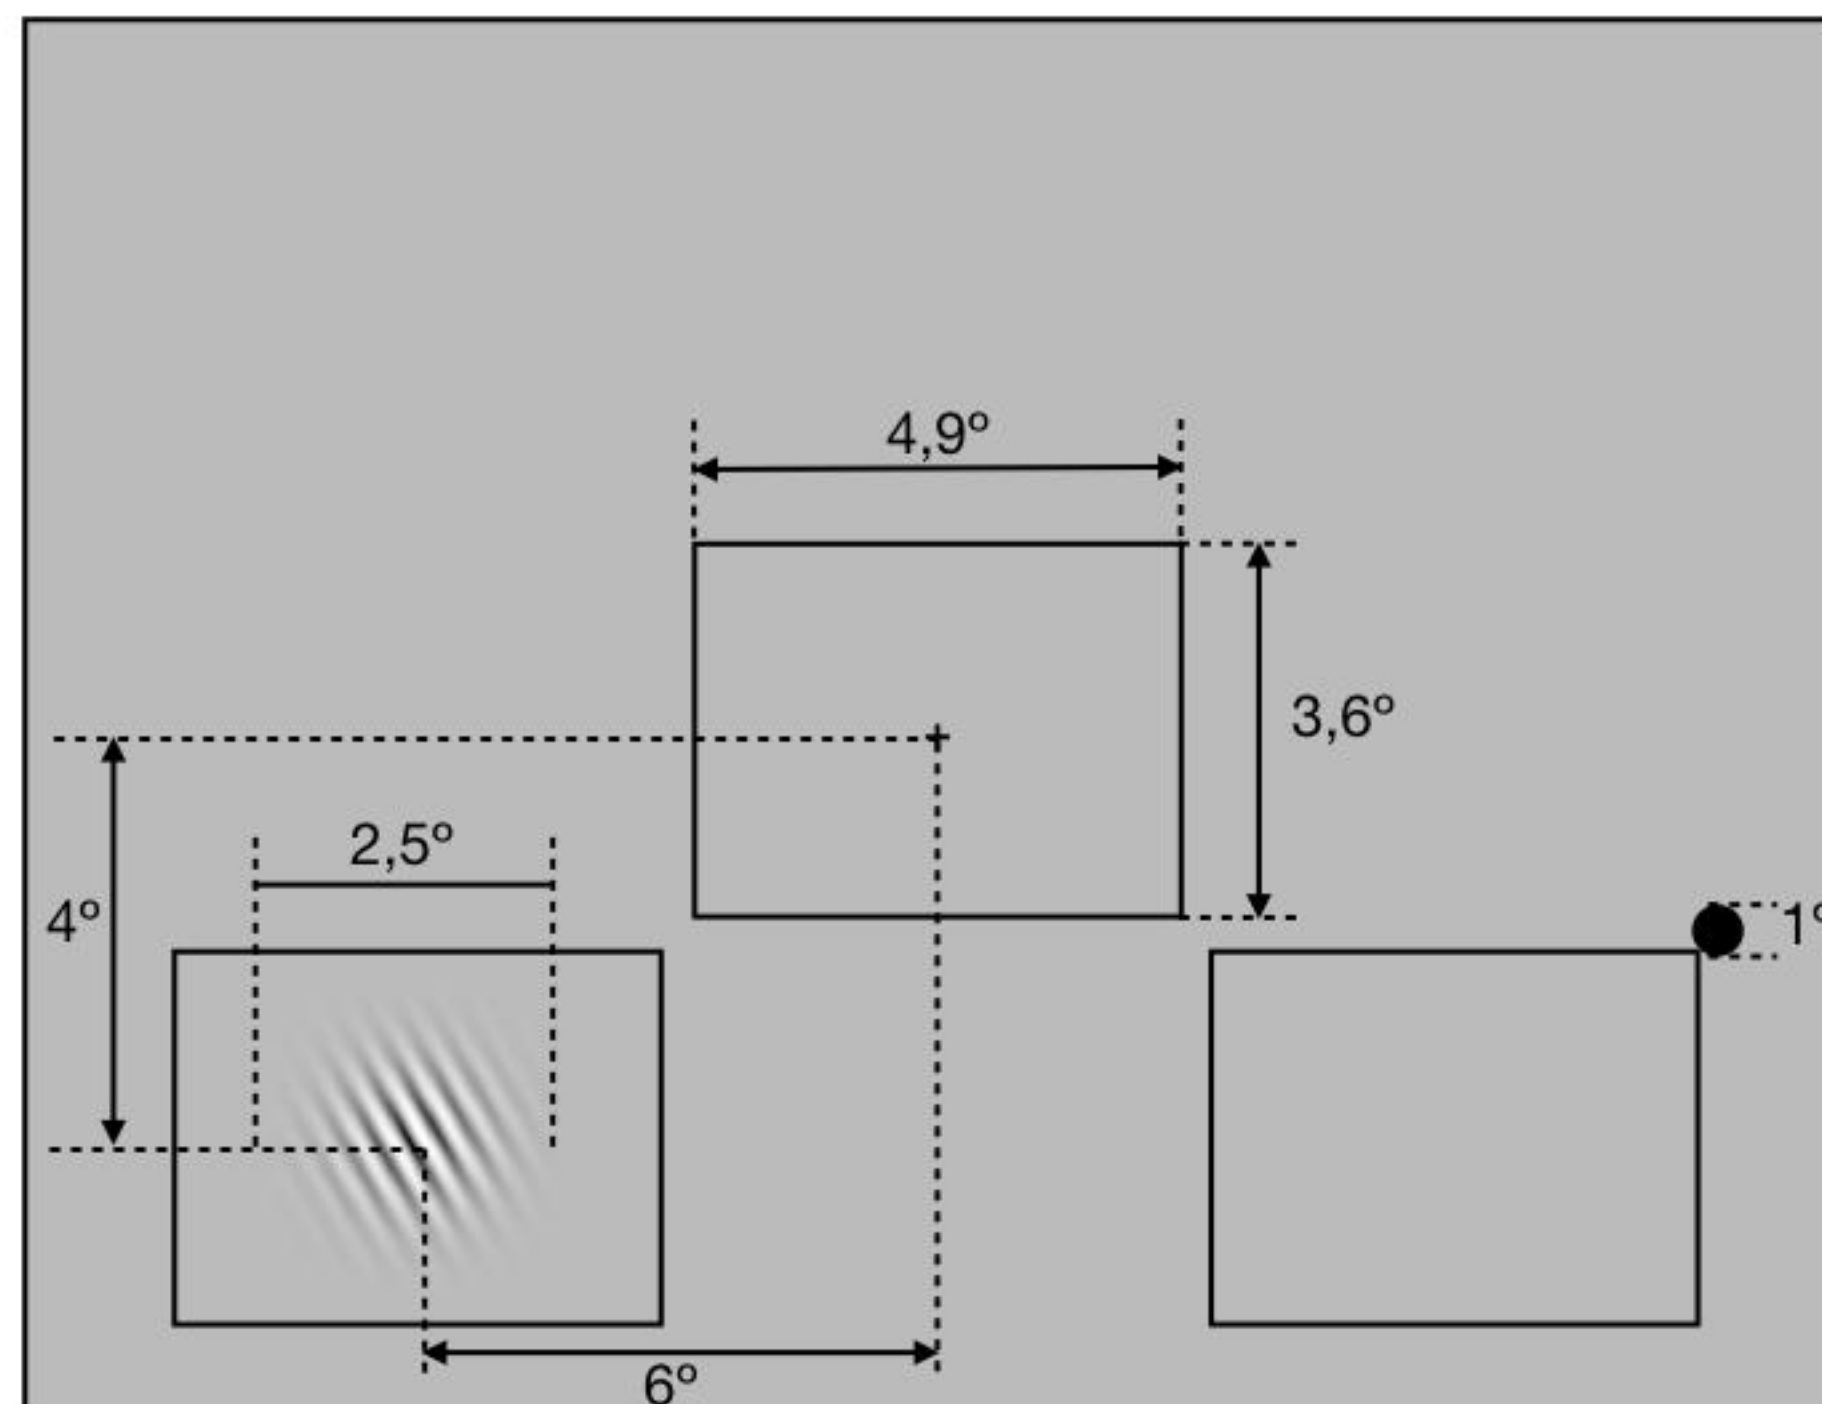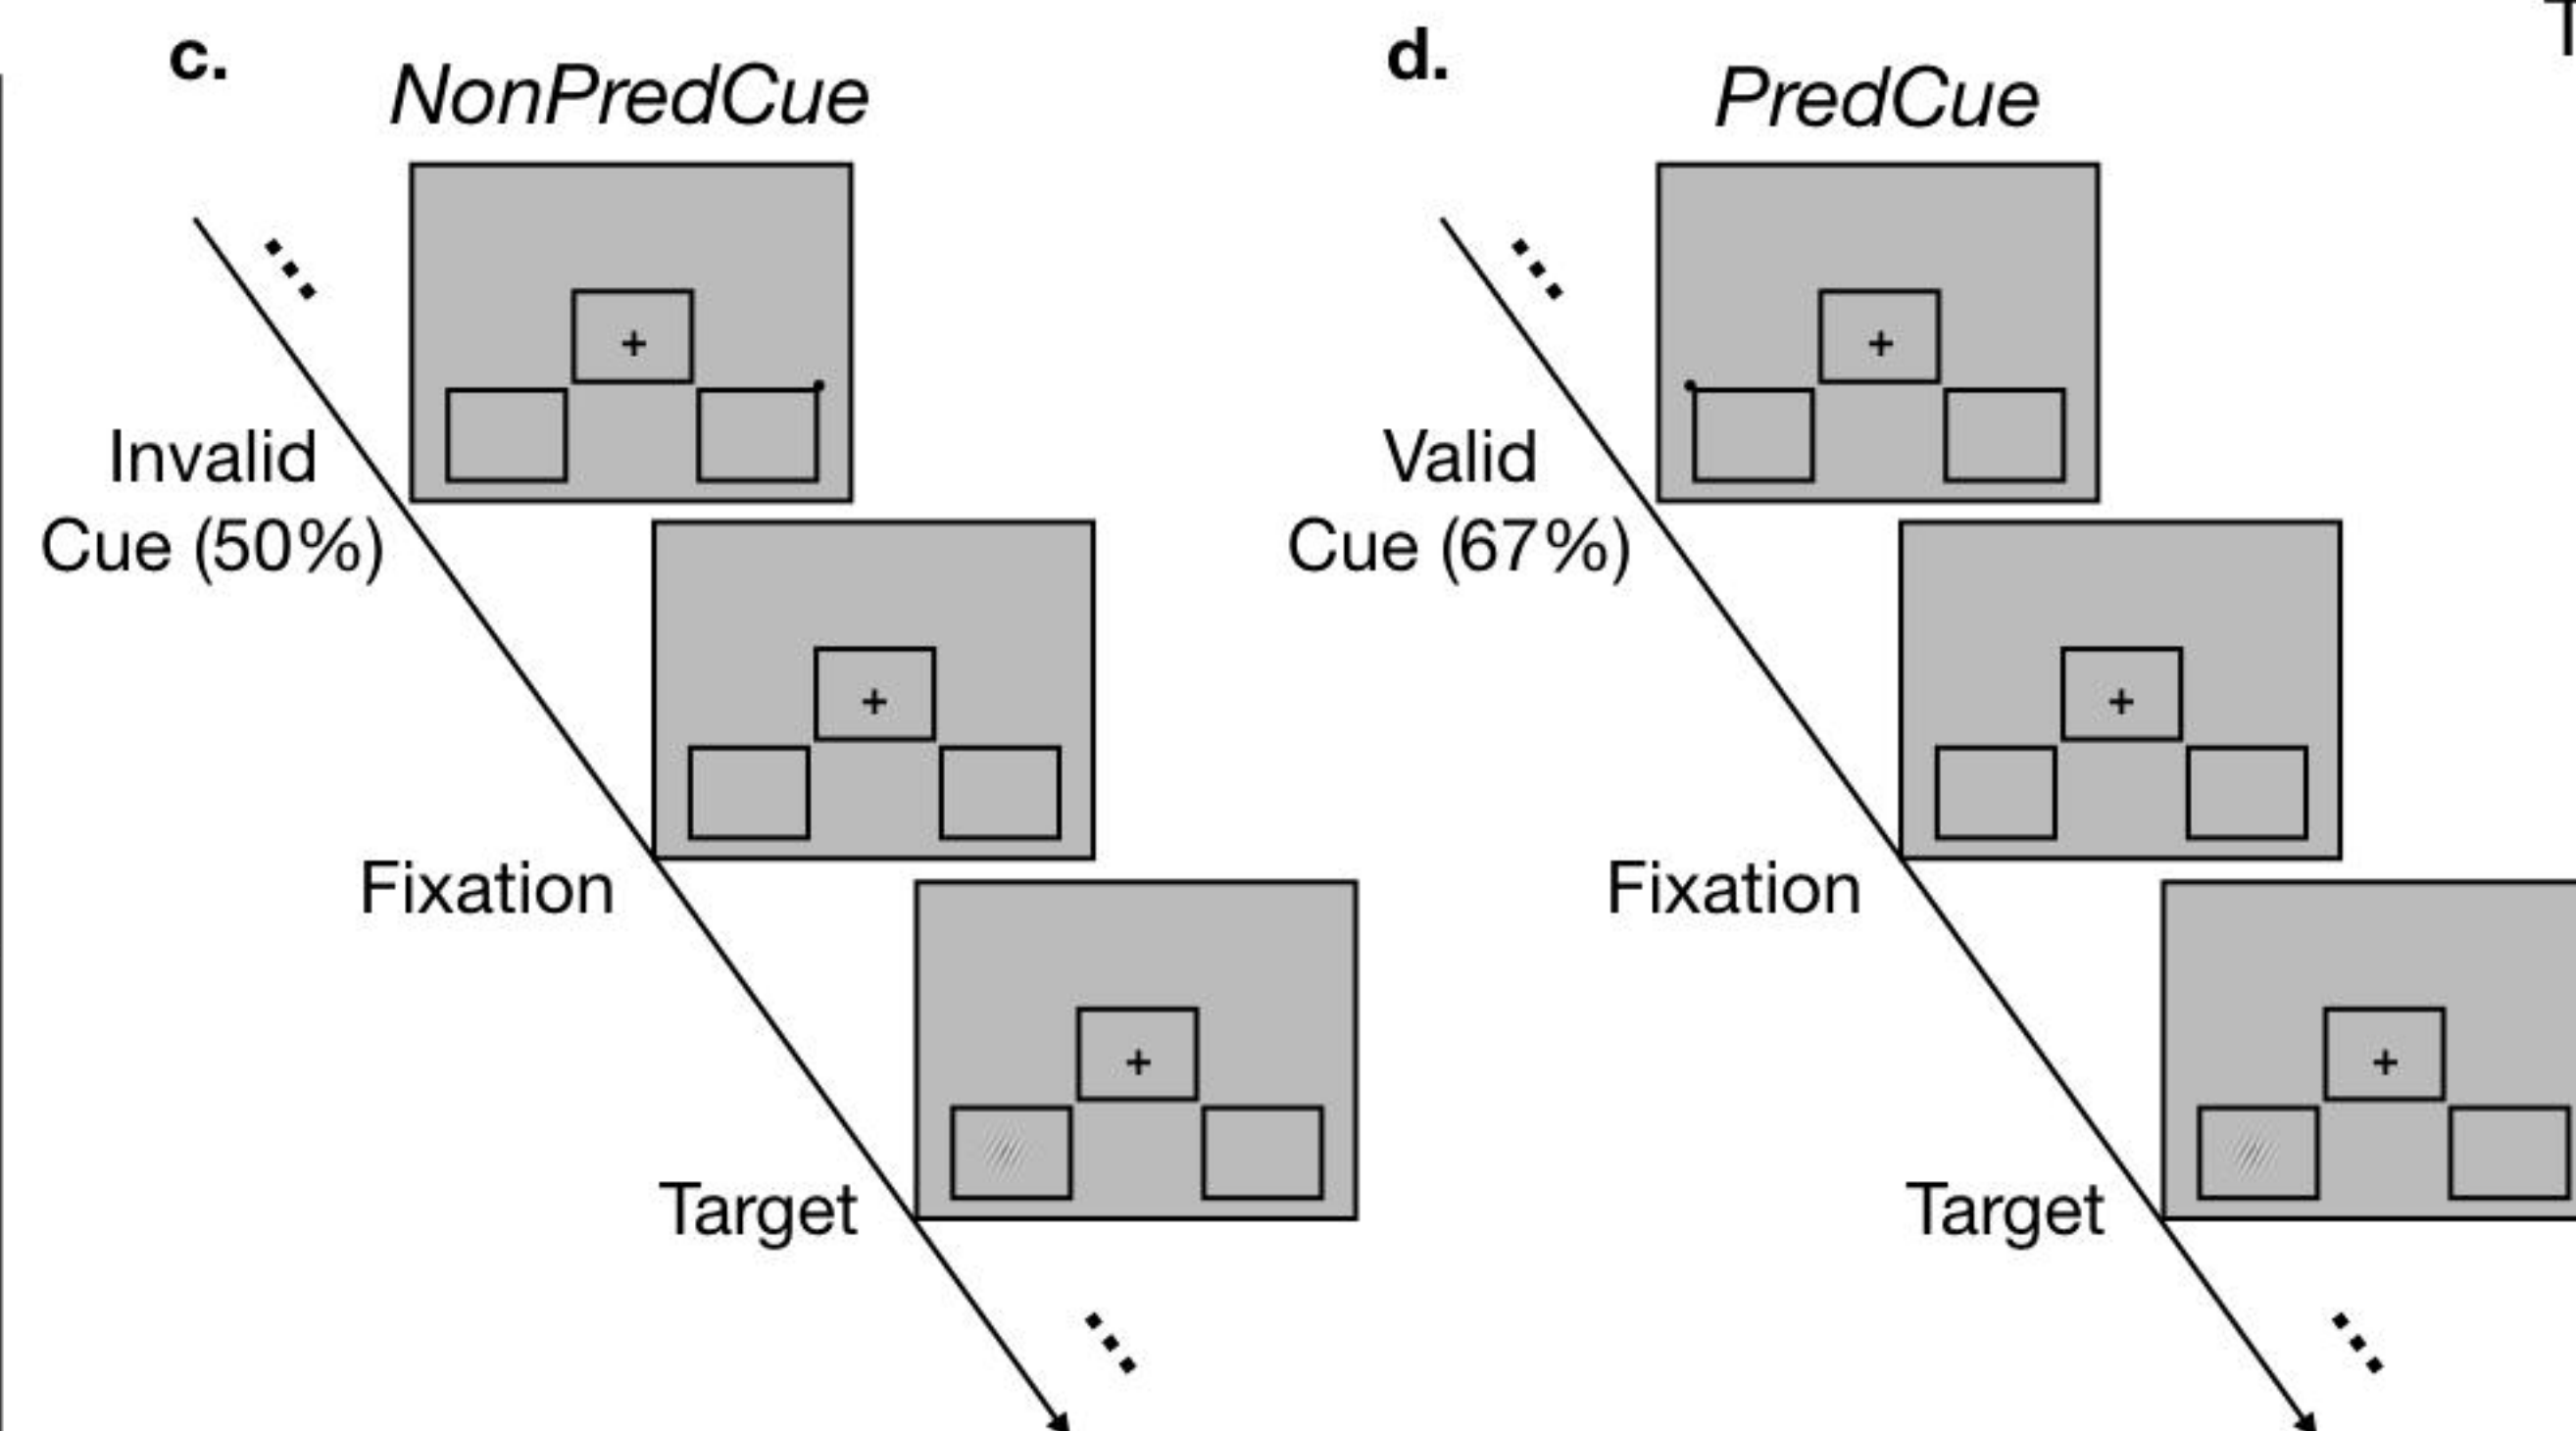



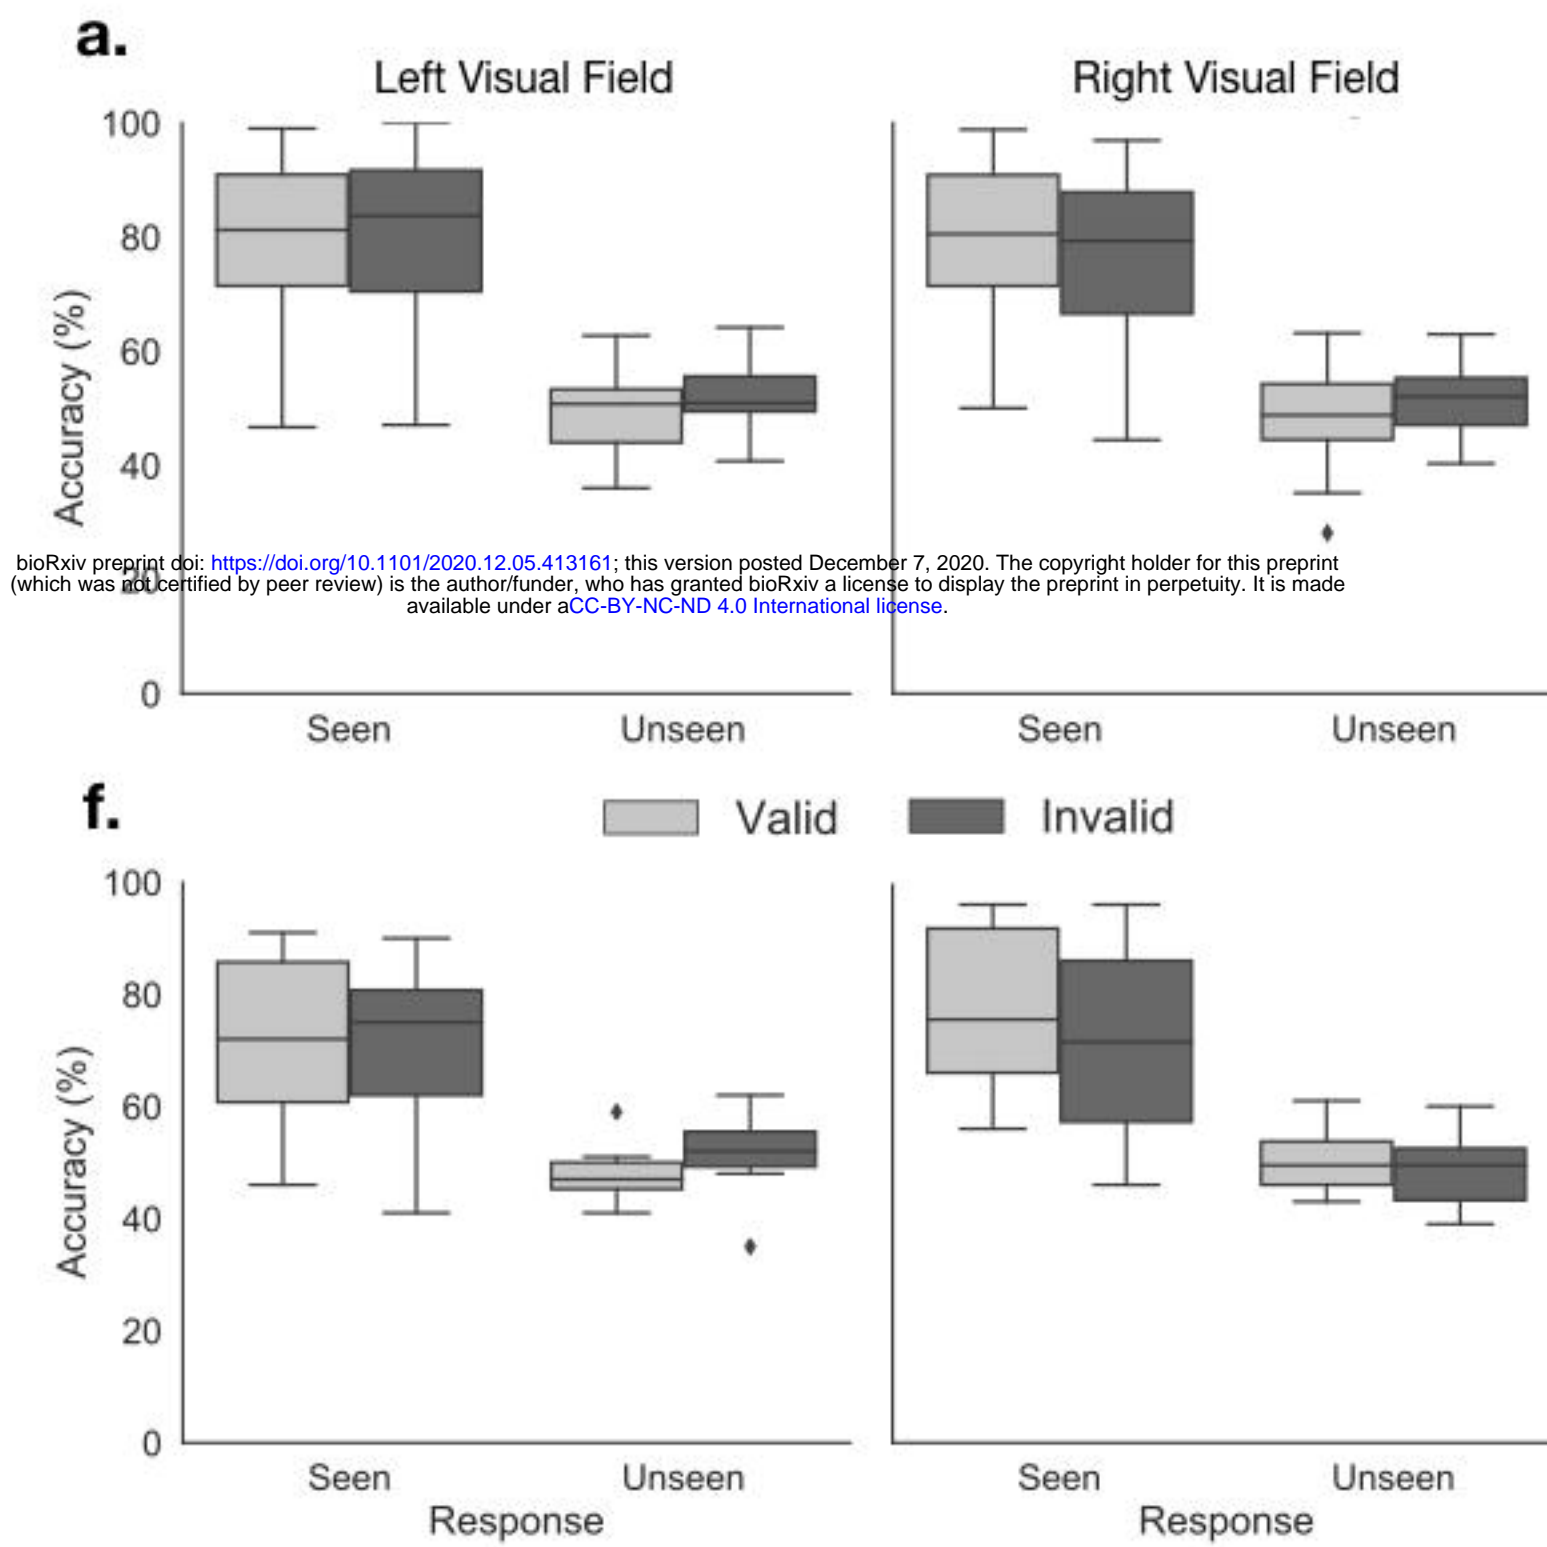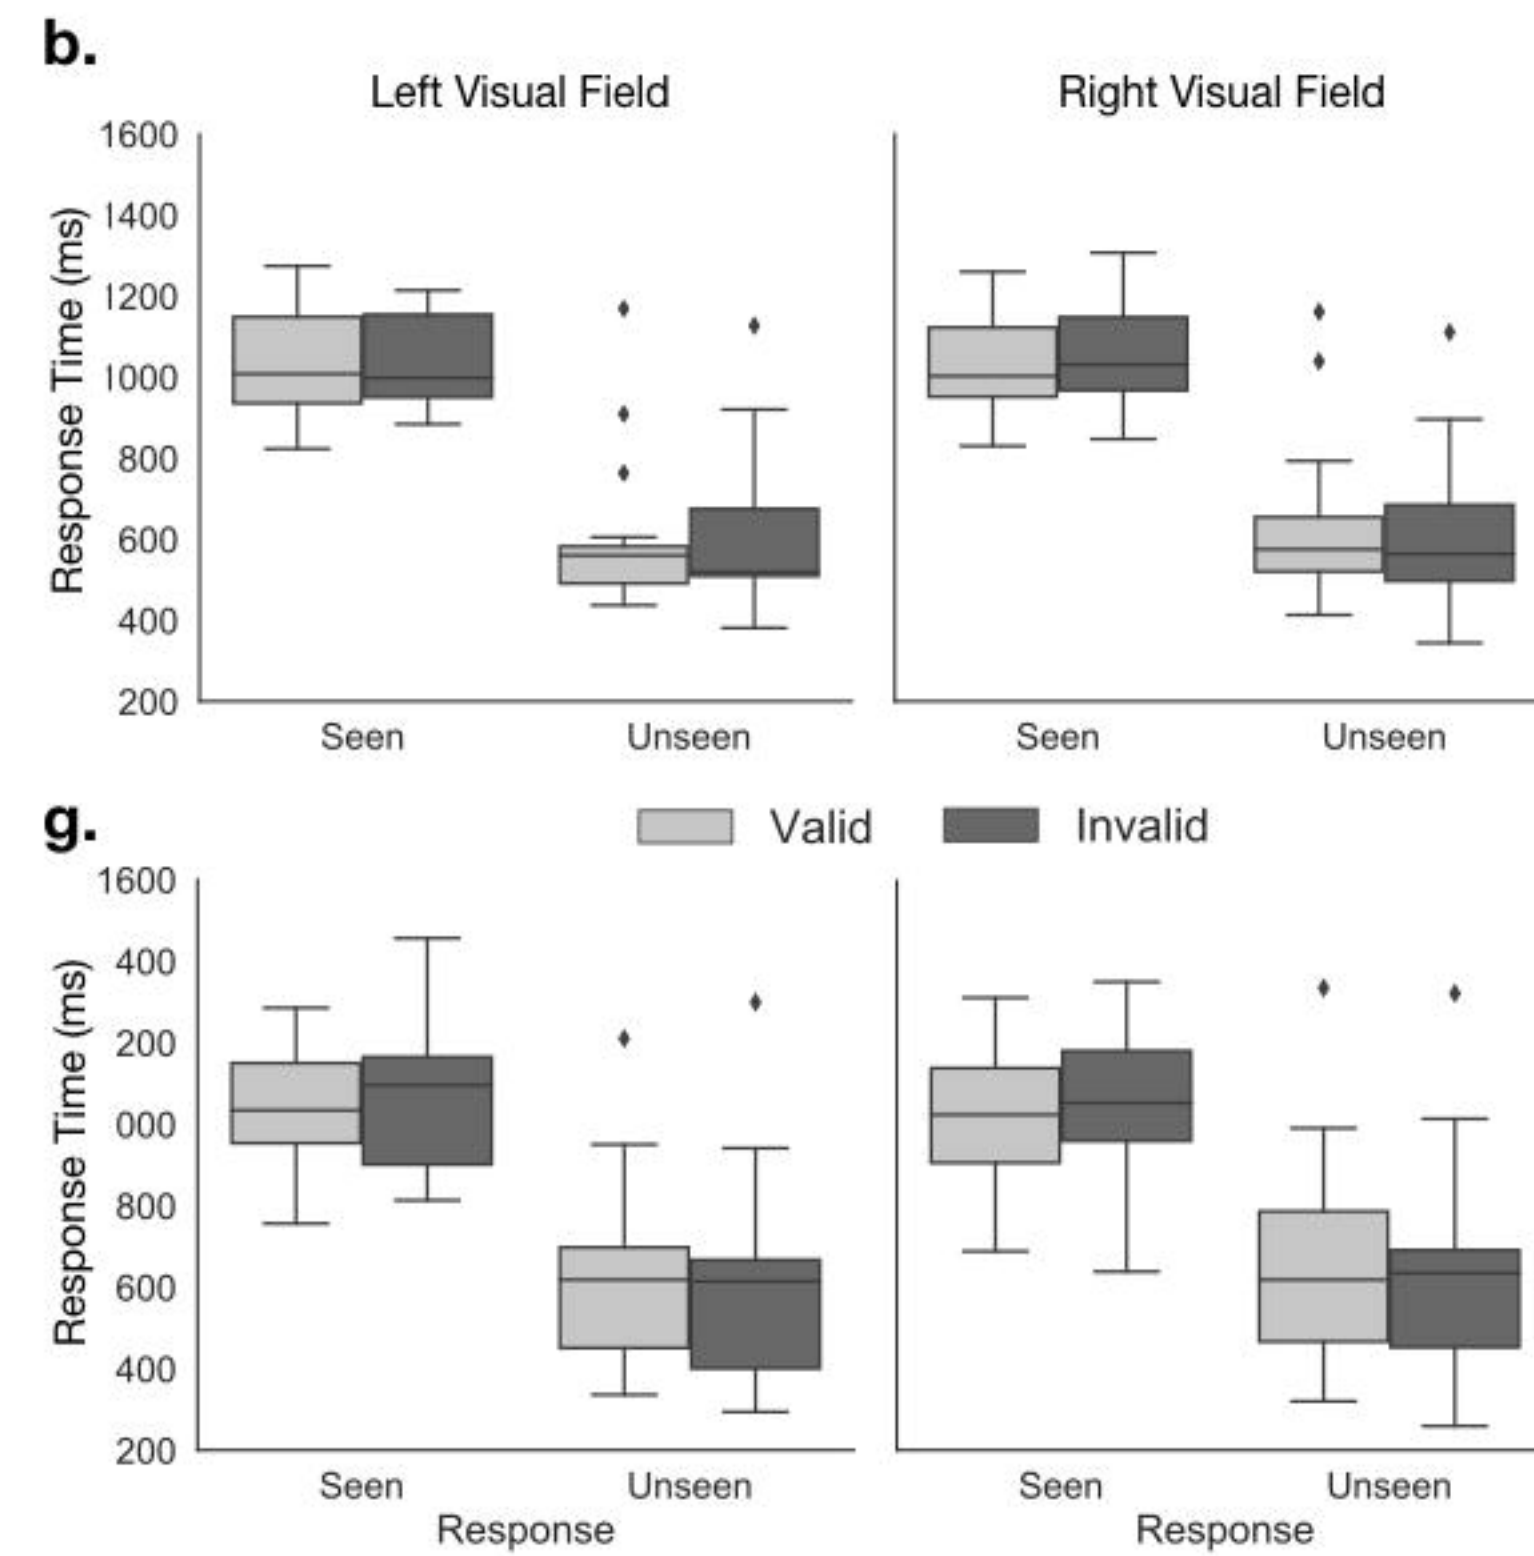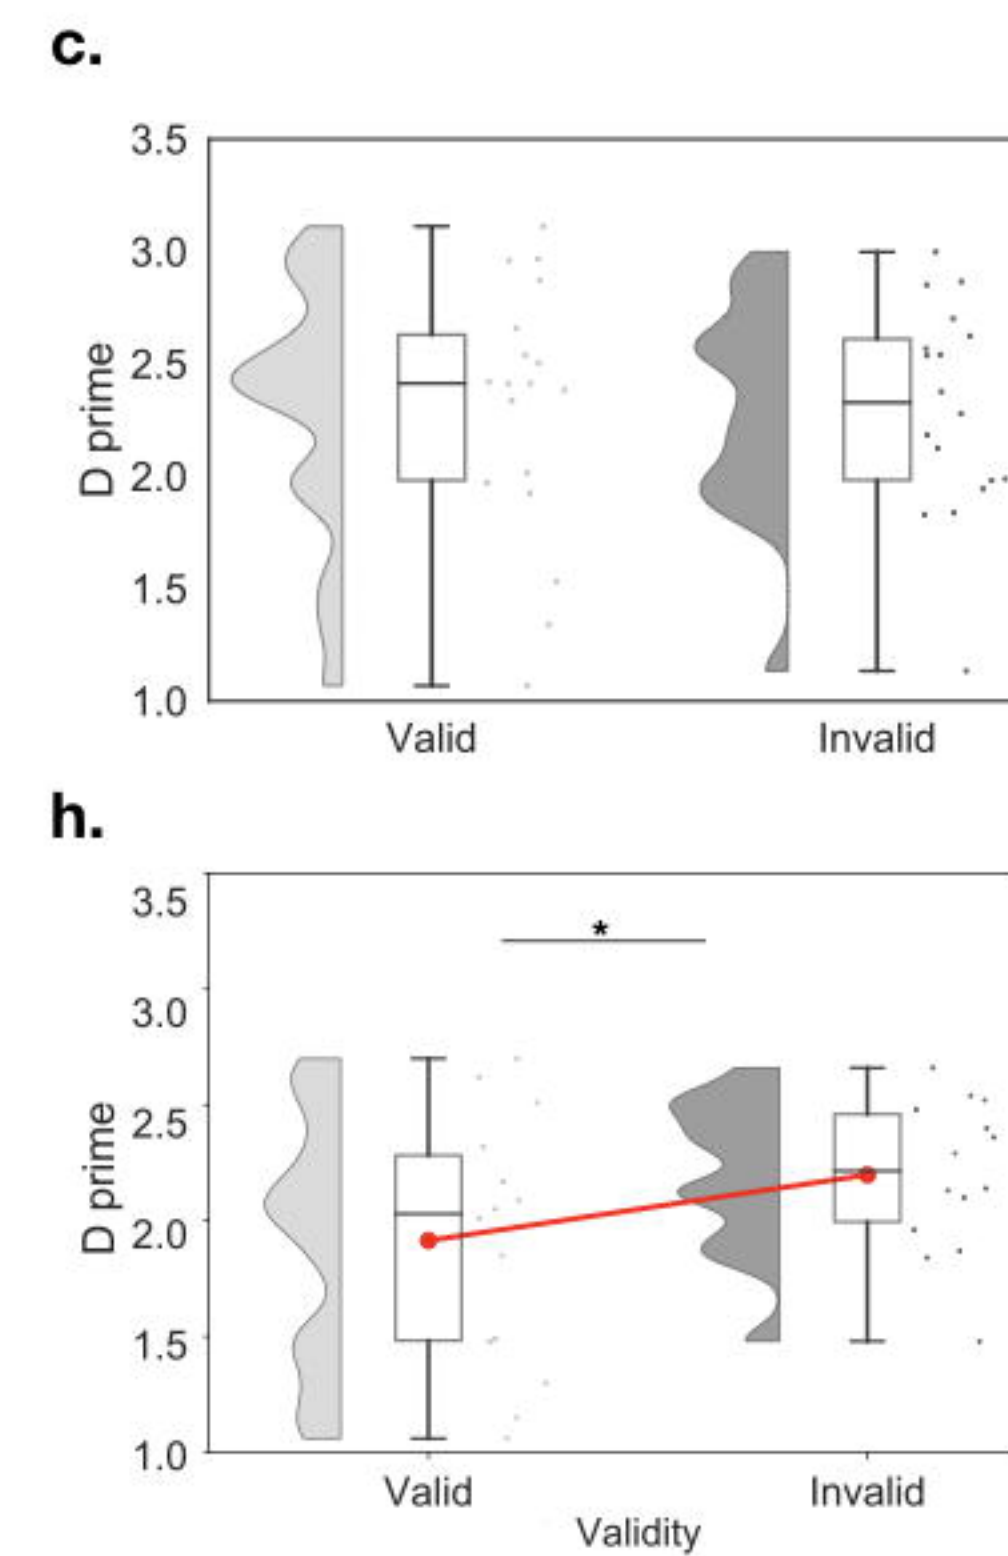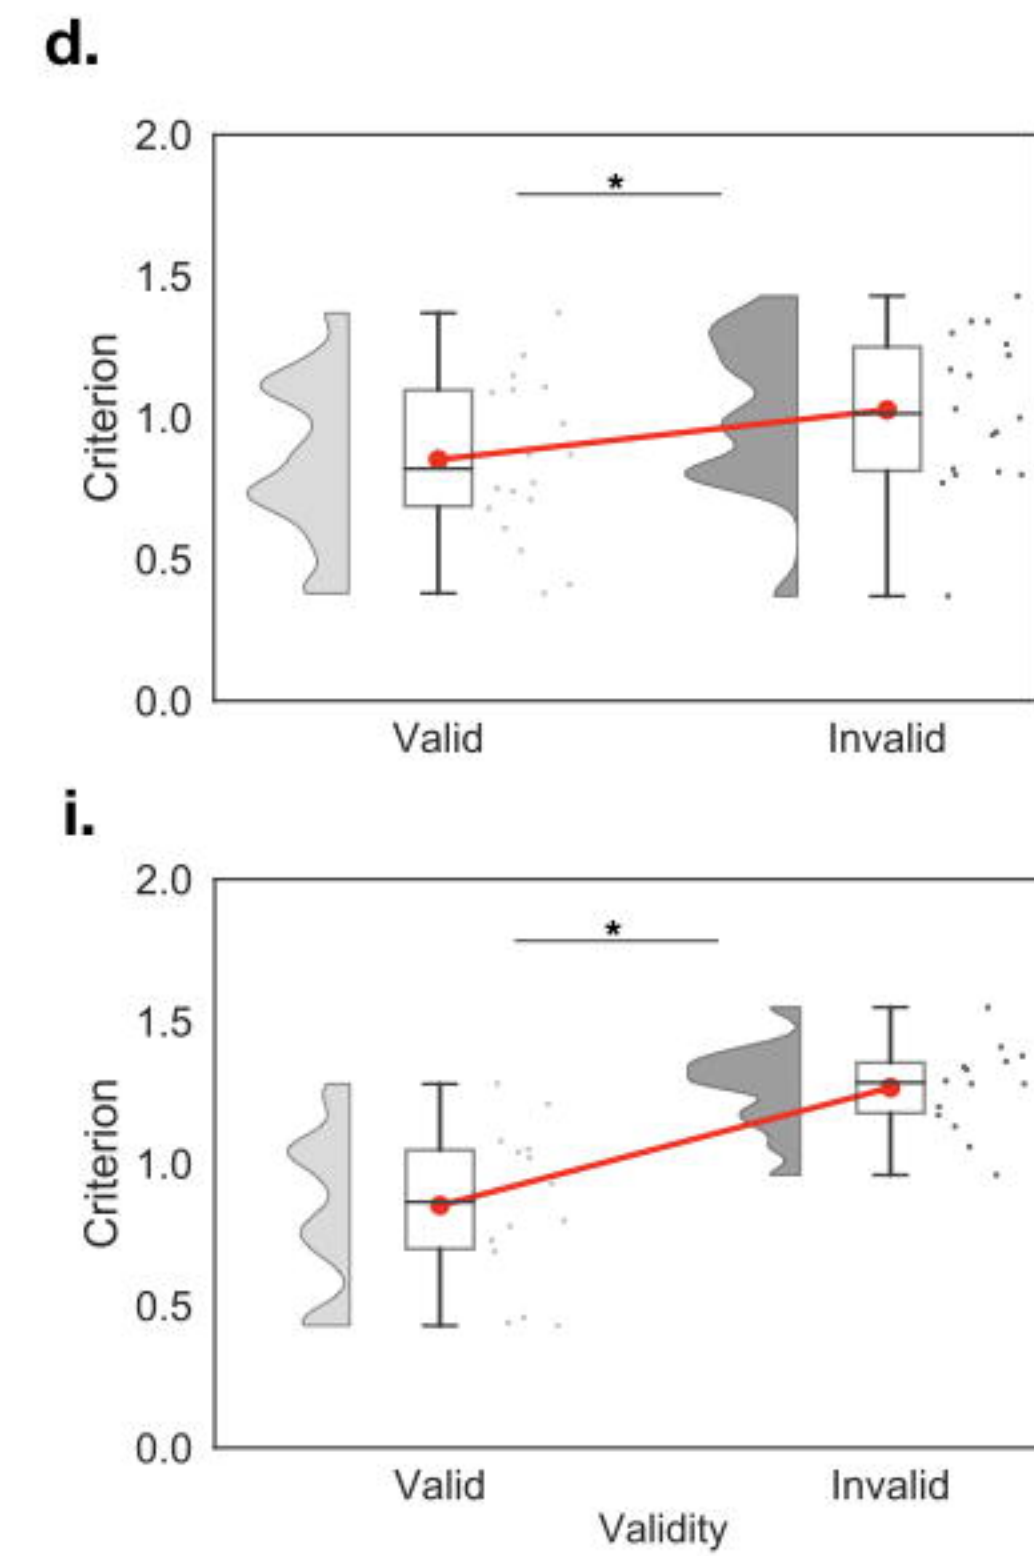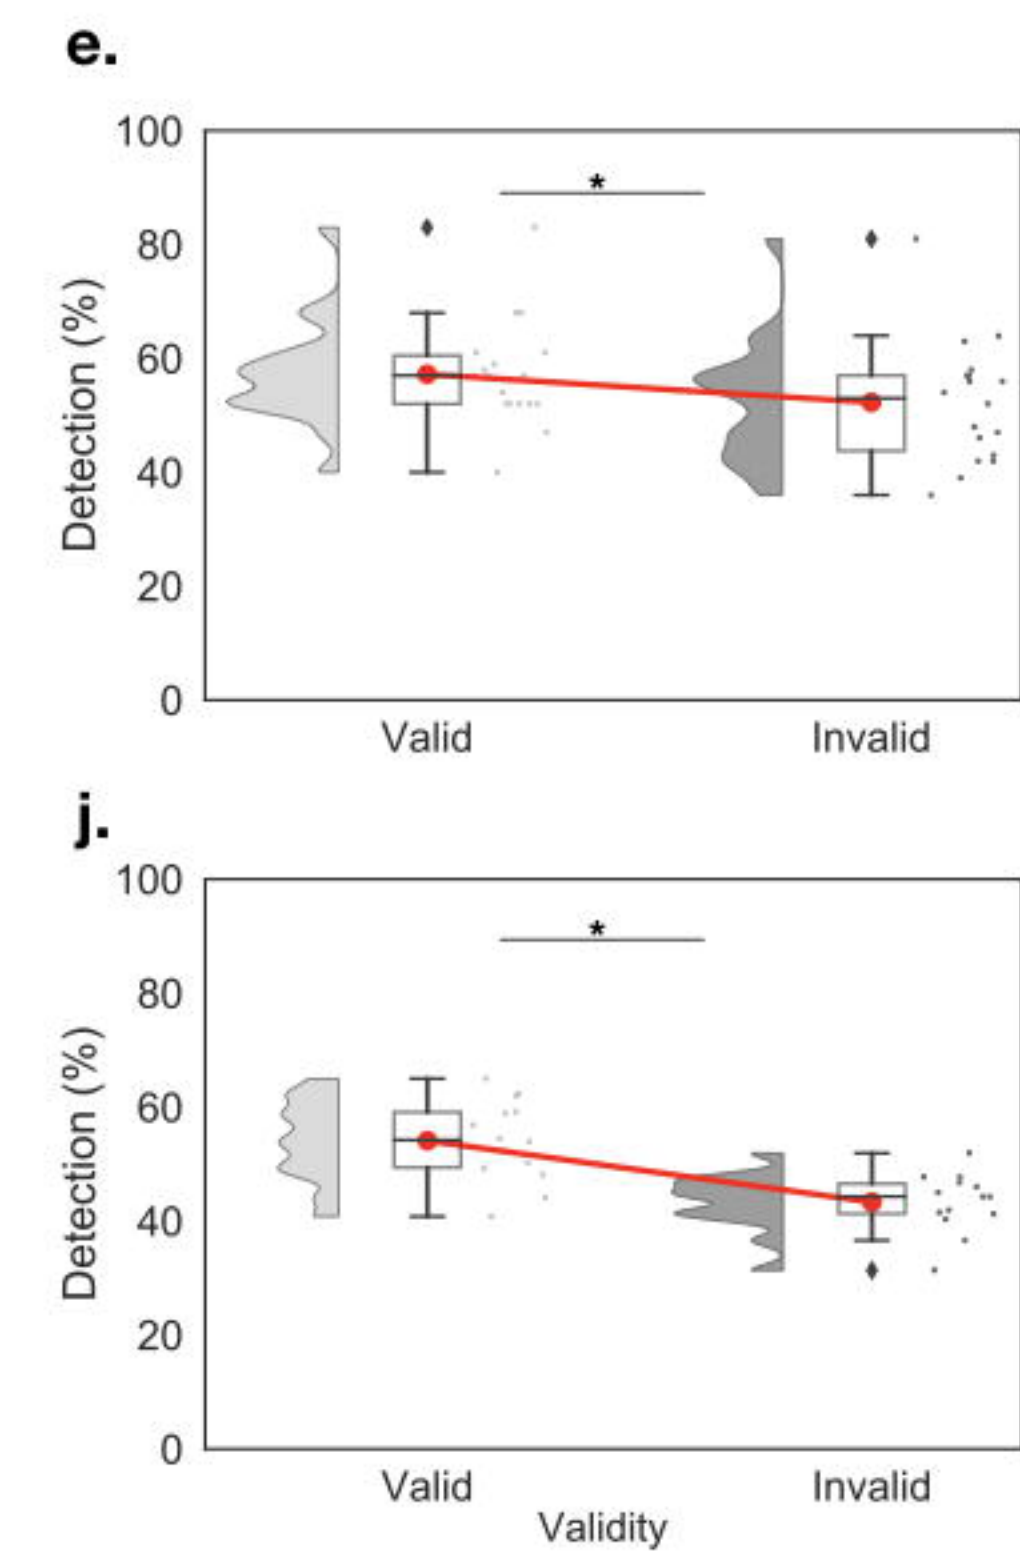



**a.**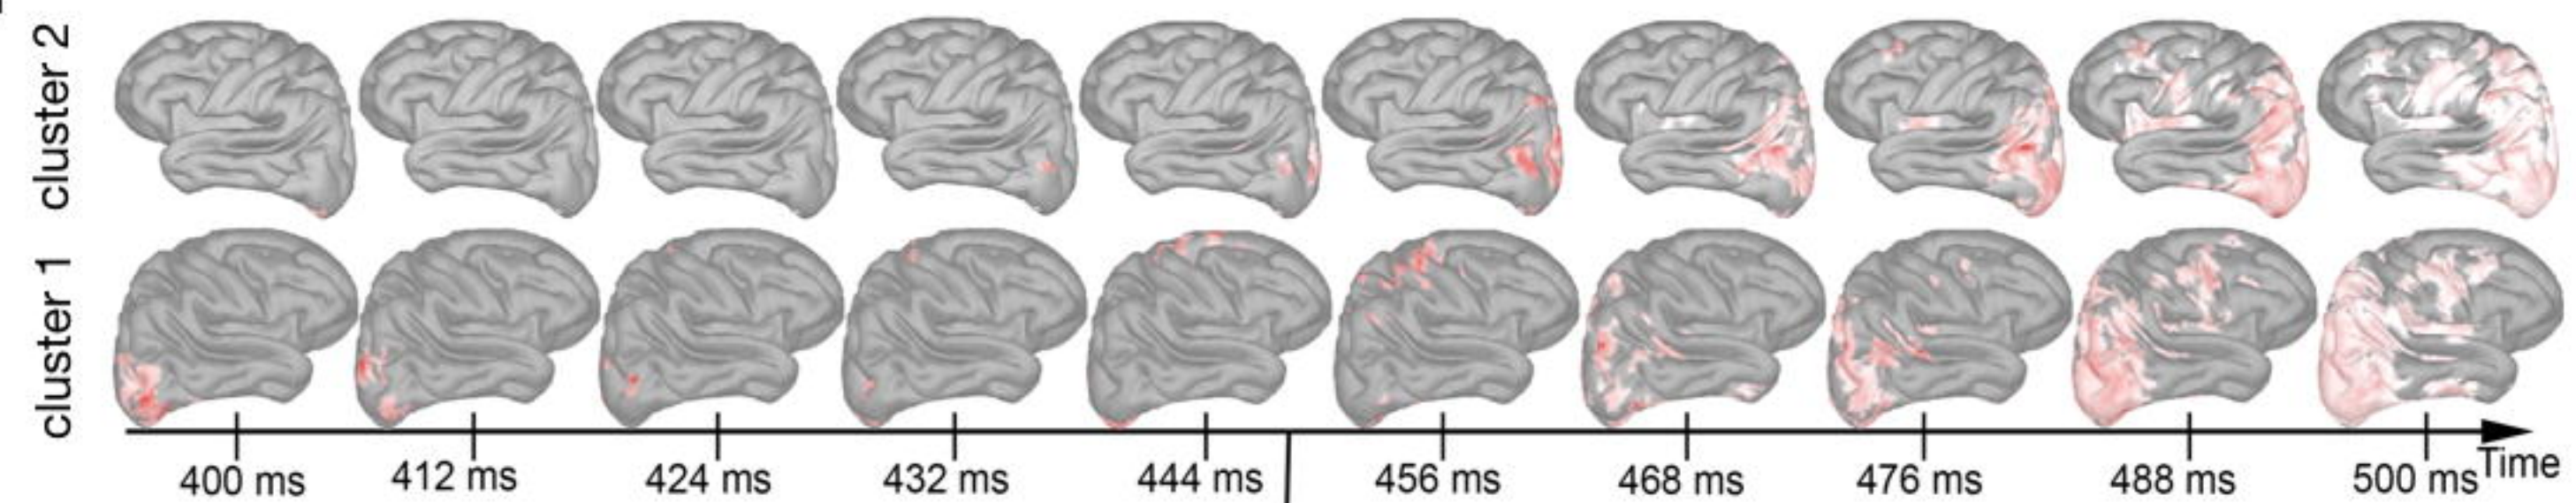

bioRxiv preprint doi: <https://doi.org/10.1101/2020.12.05.413161>; this version posted December 7, 2020. The copyright holder for this preprint (which was not certified by peer review) is the author/funder, who has granted bioRxiv a license to display the preprint in perpetuity. It is made available under aCC-BY-NC-ND 4.0 International license.

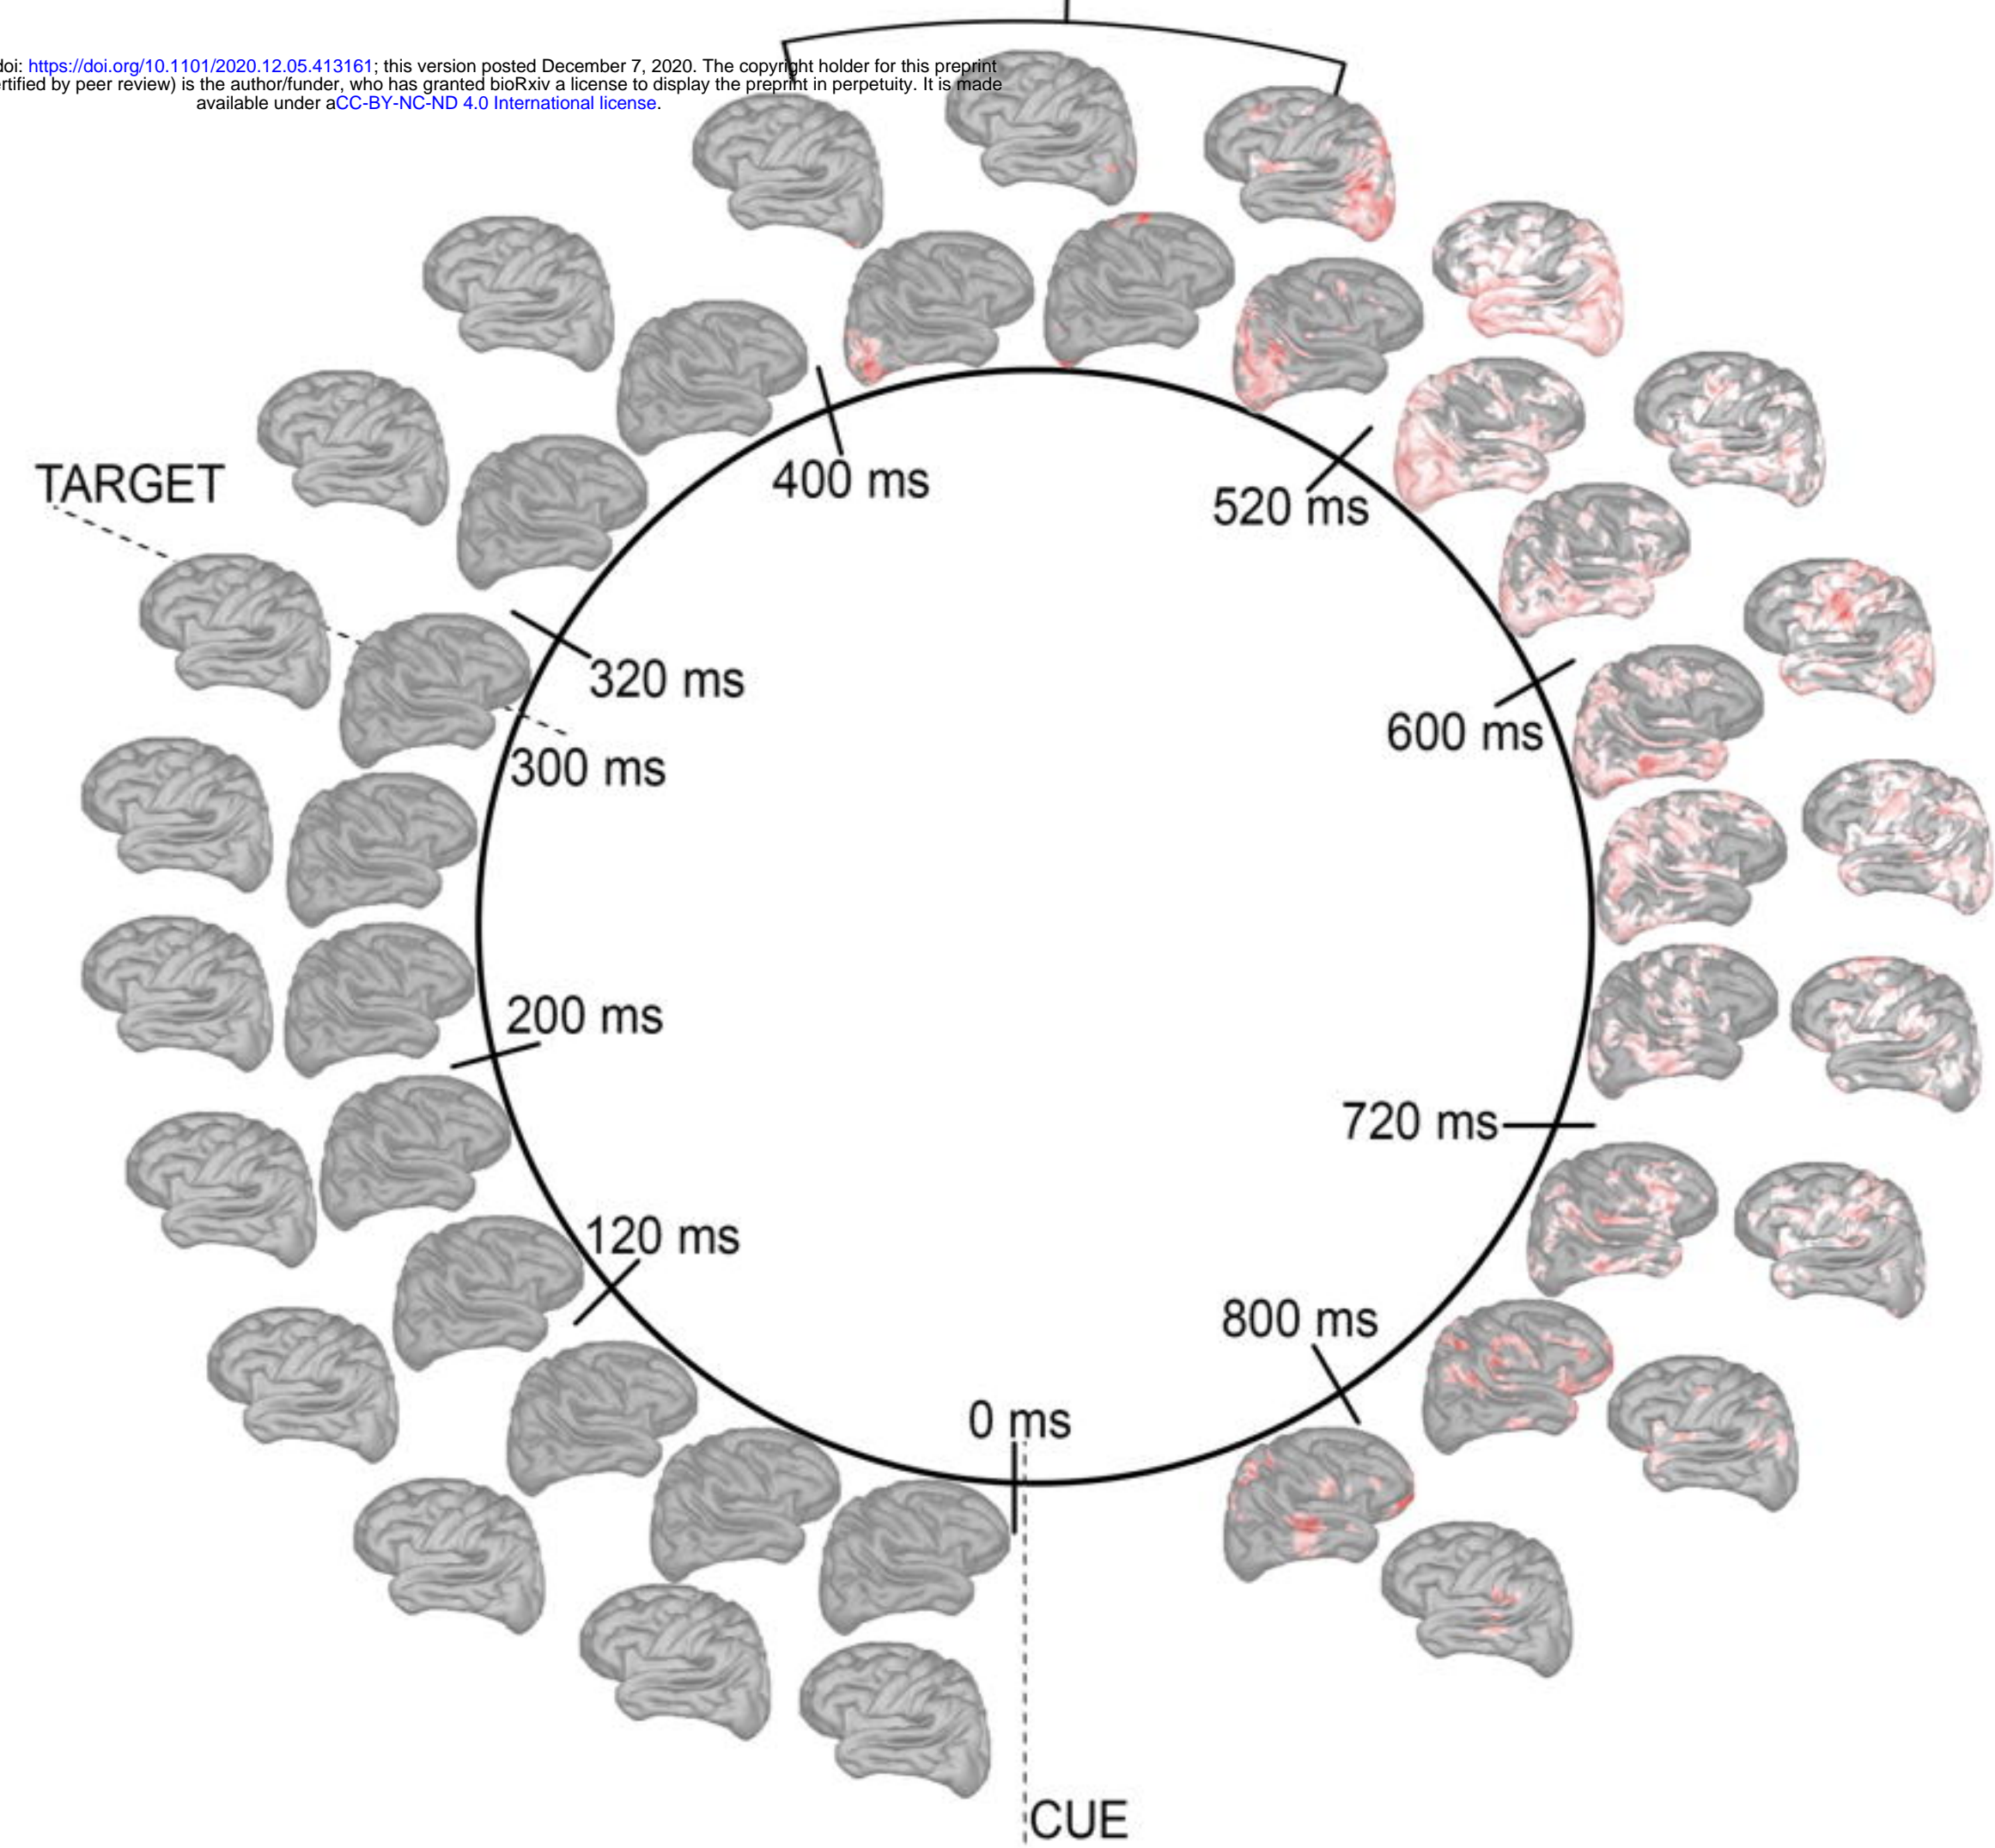**b.**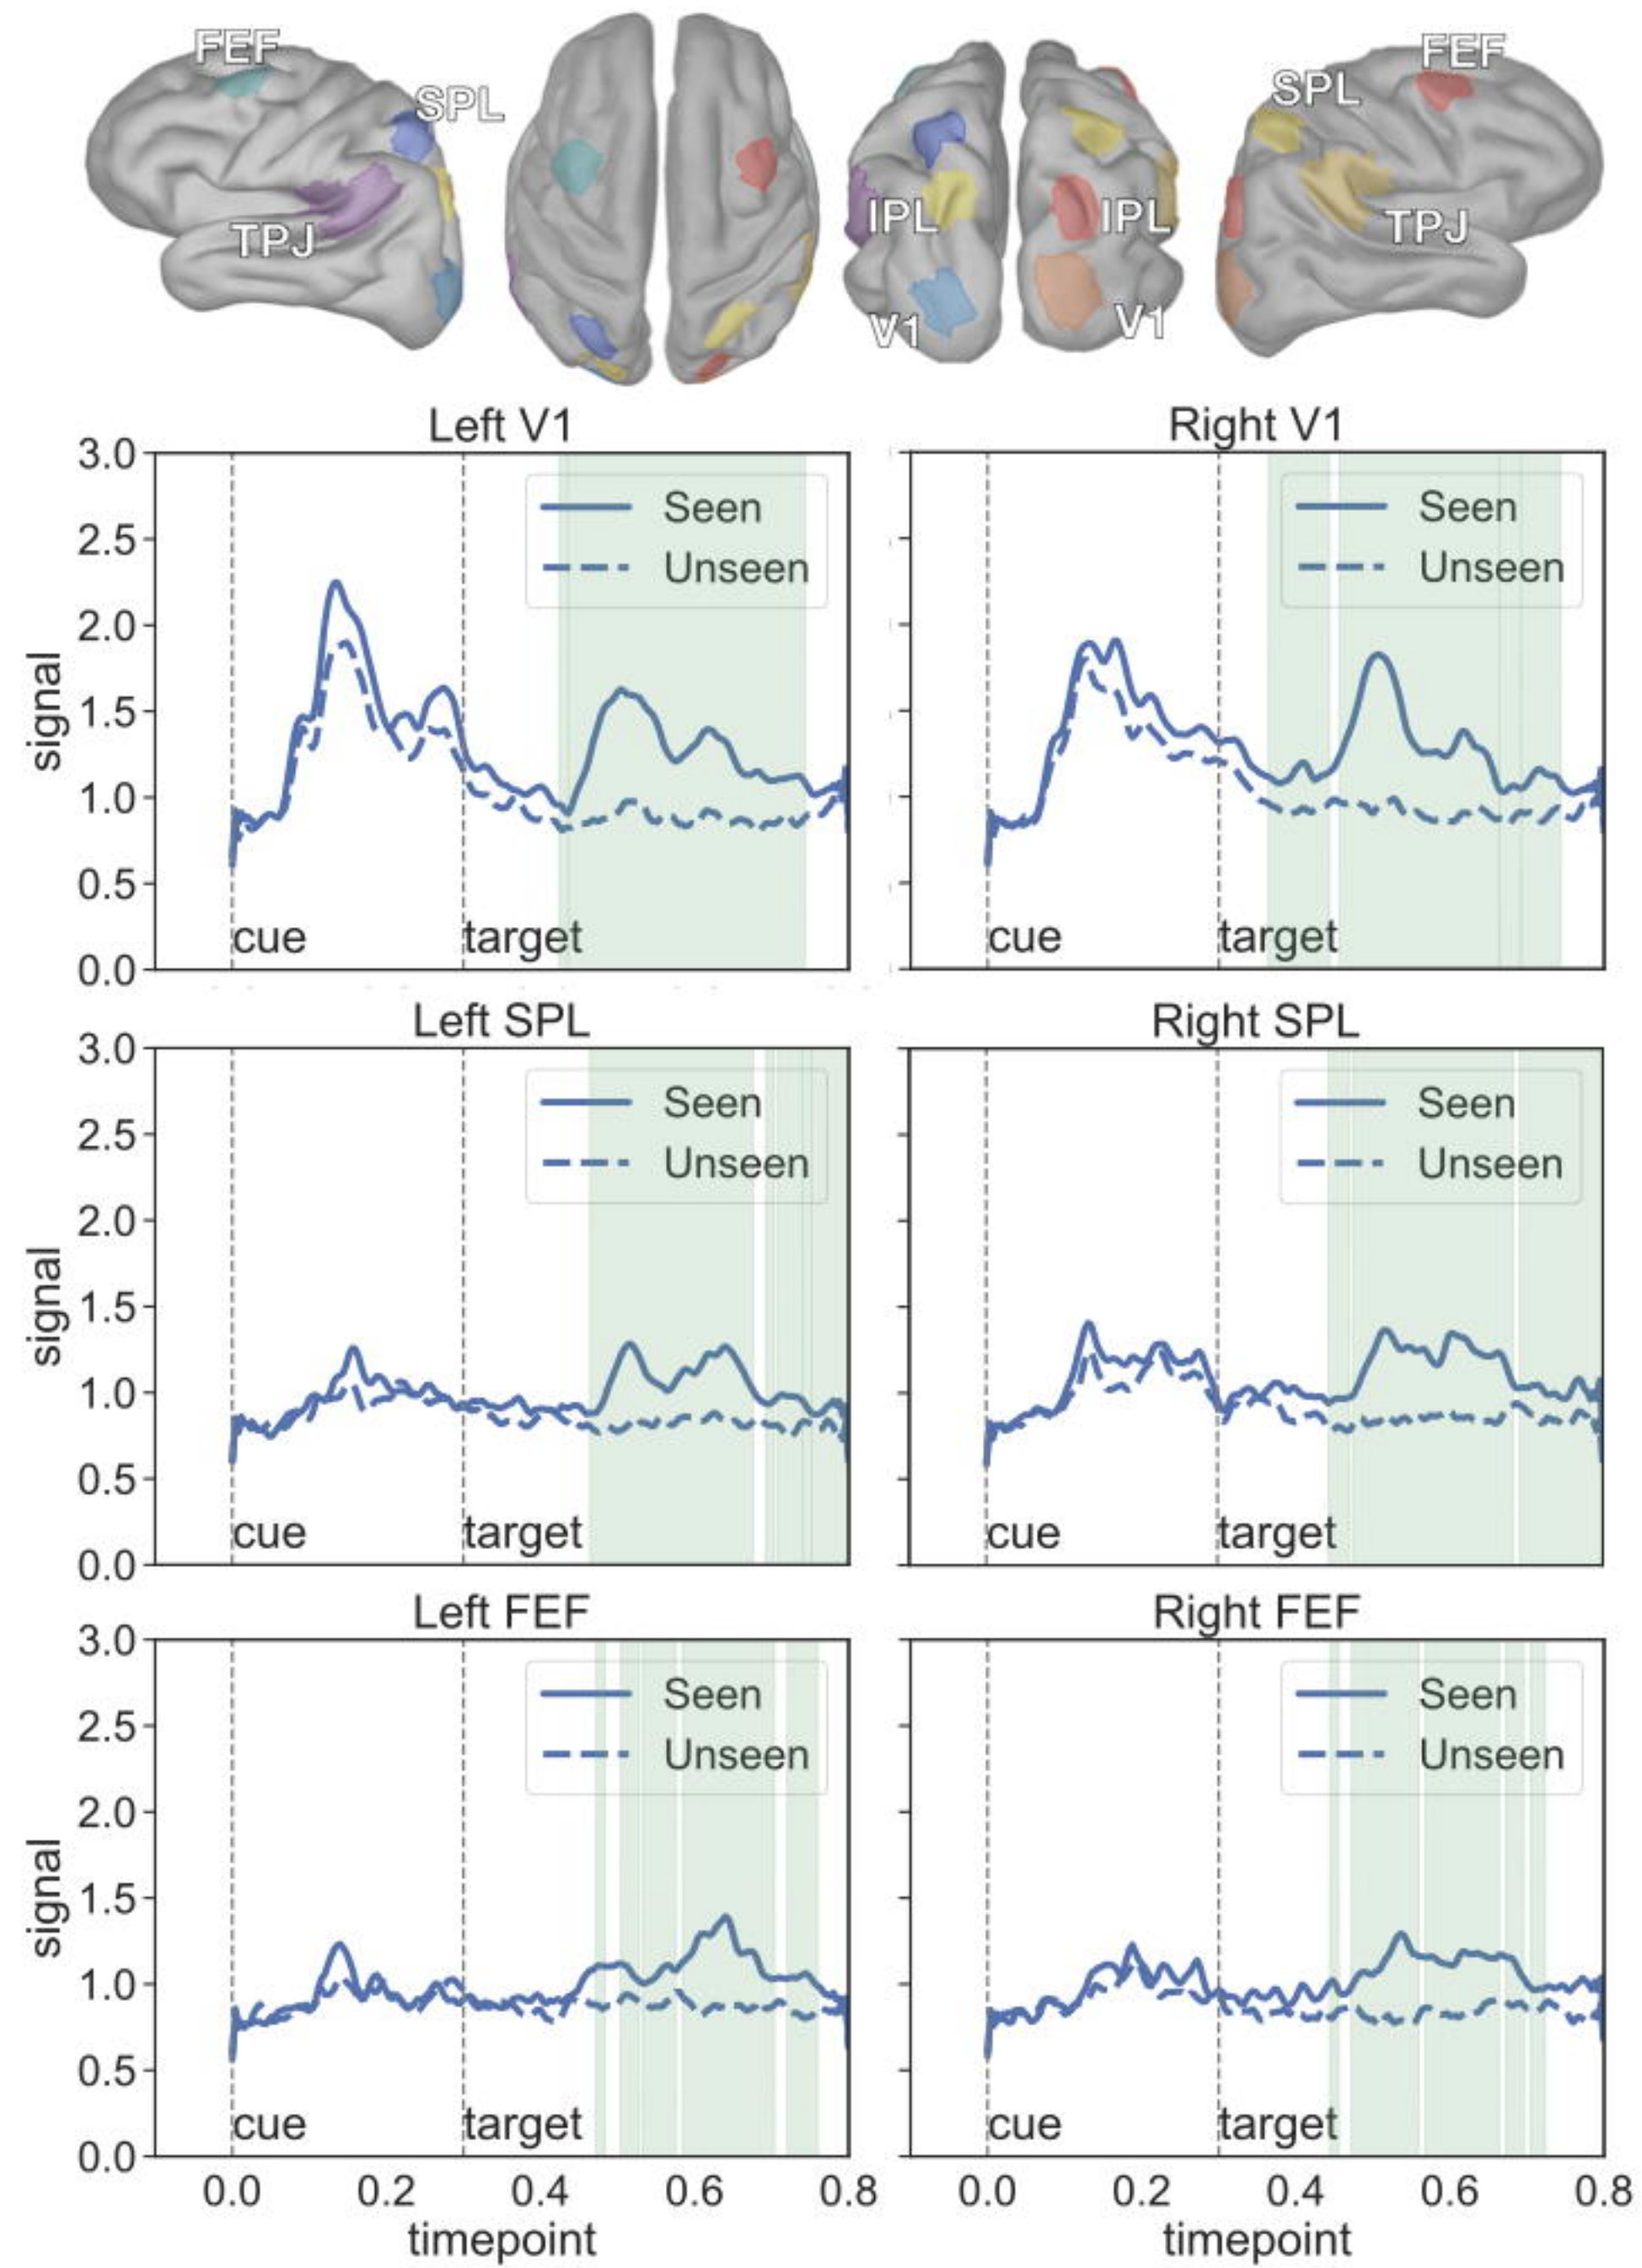







**a.**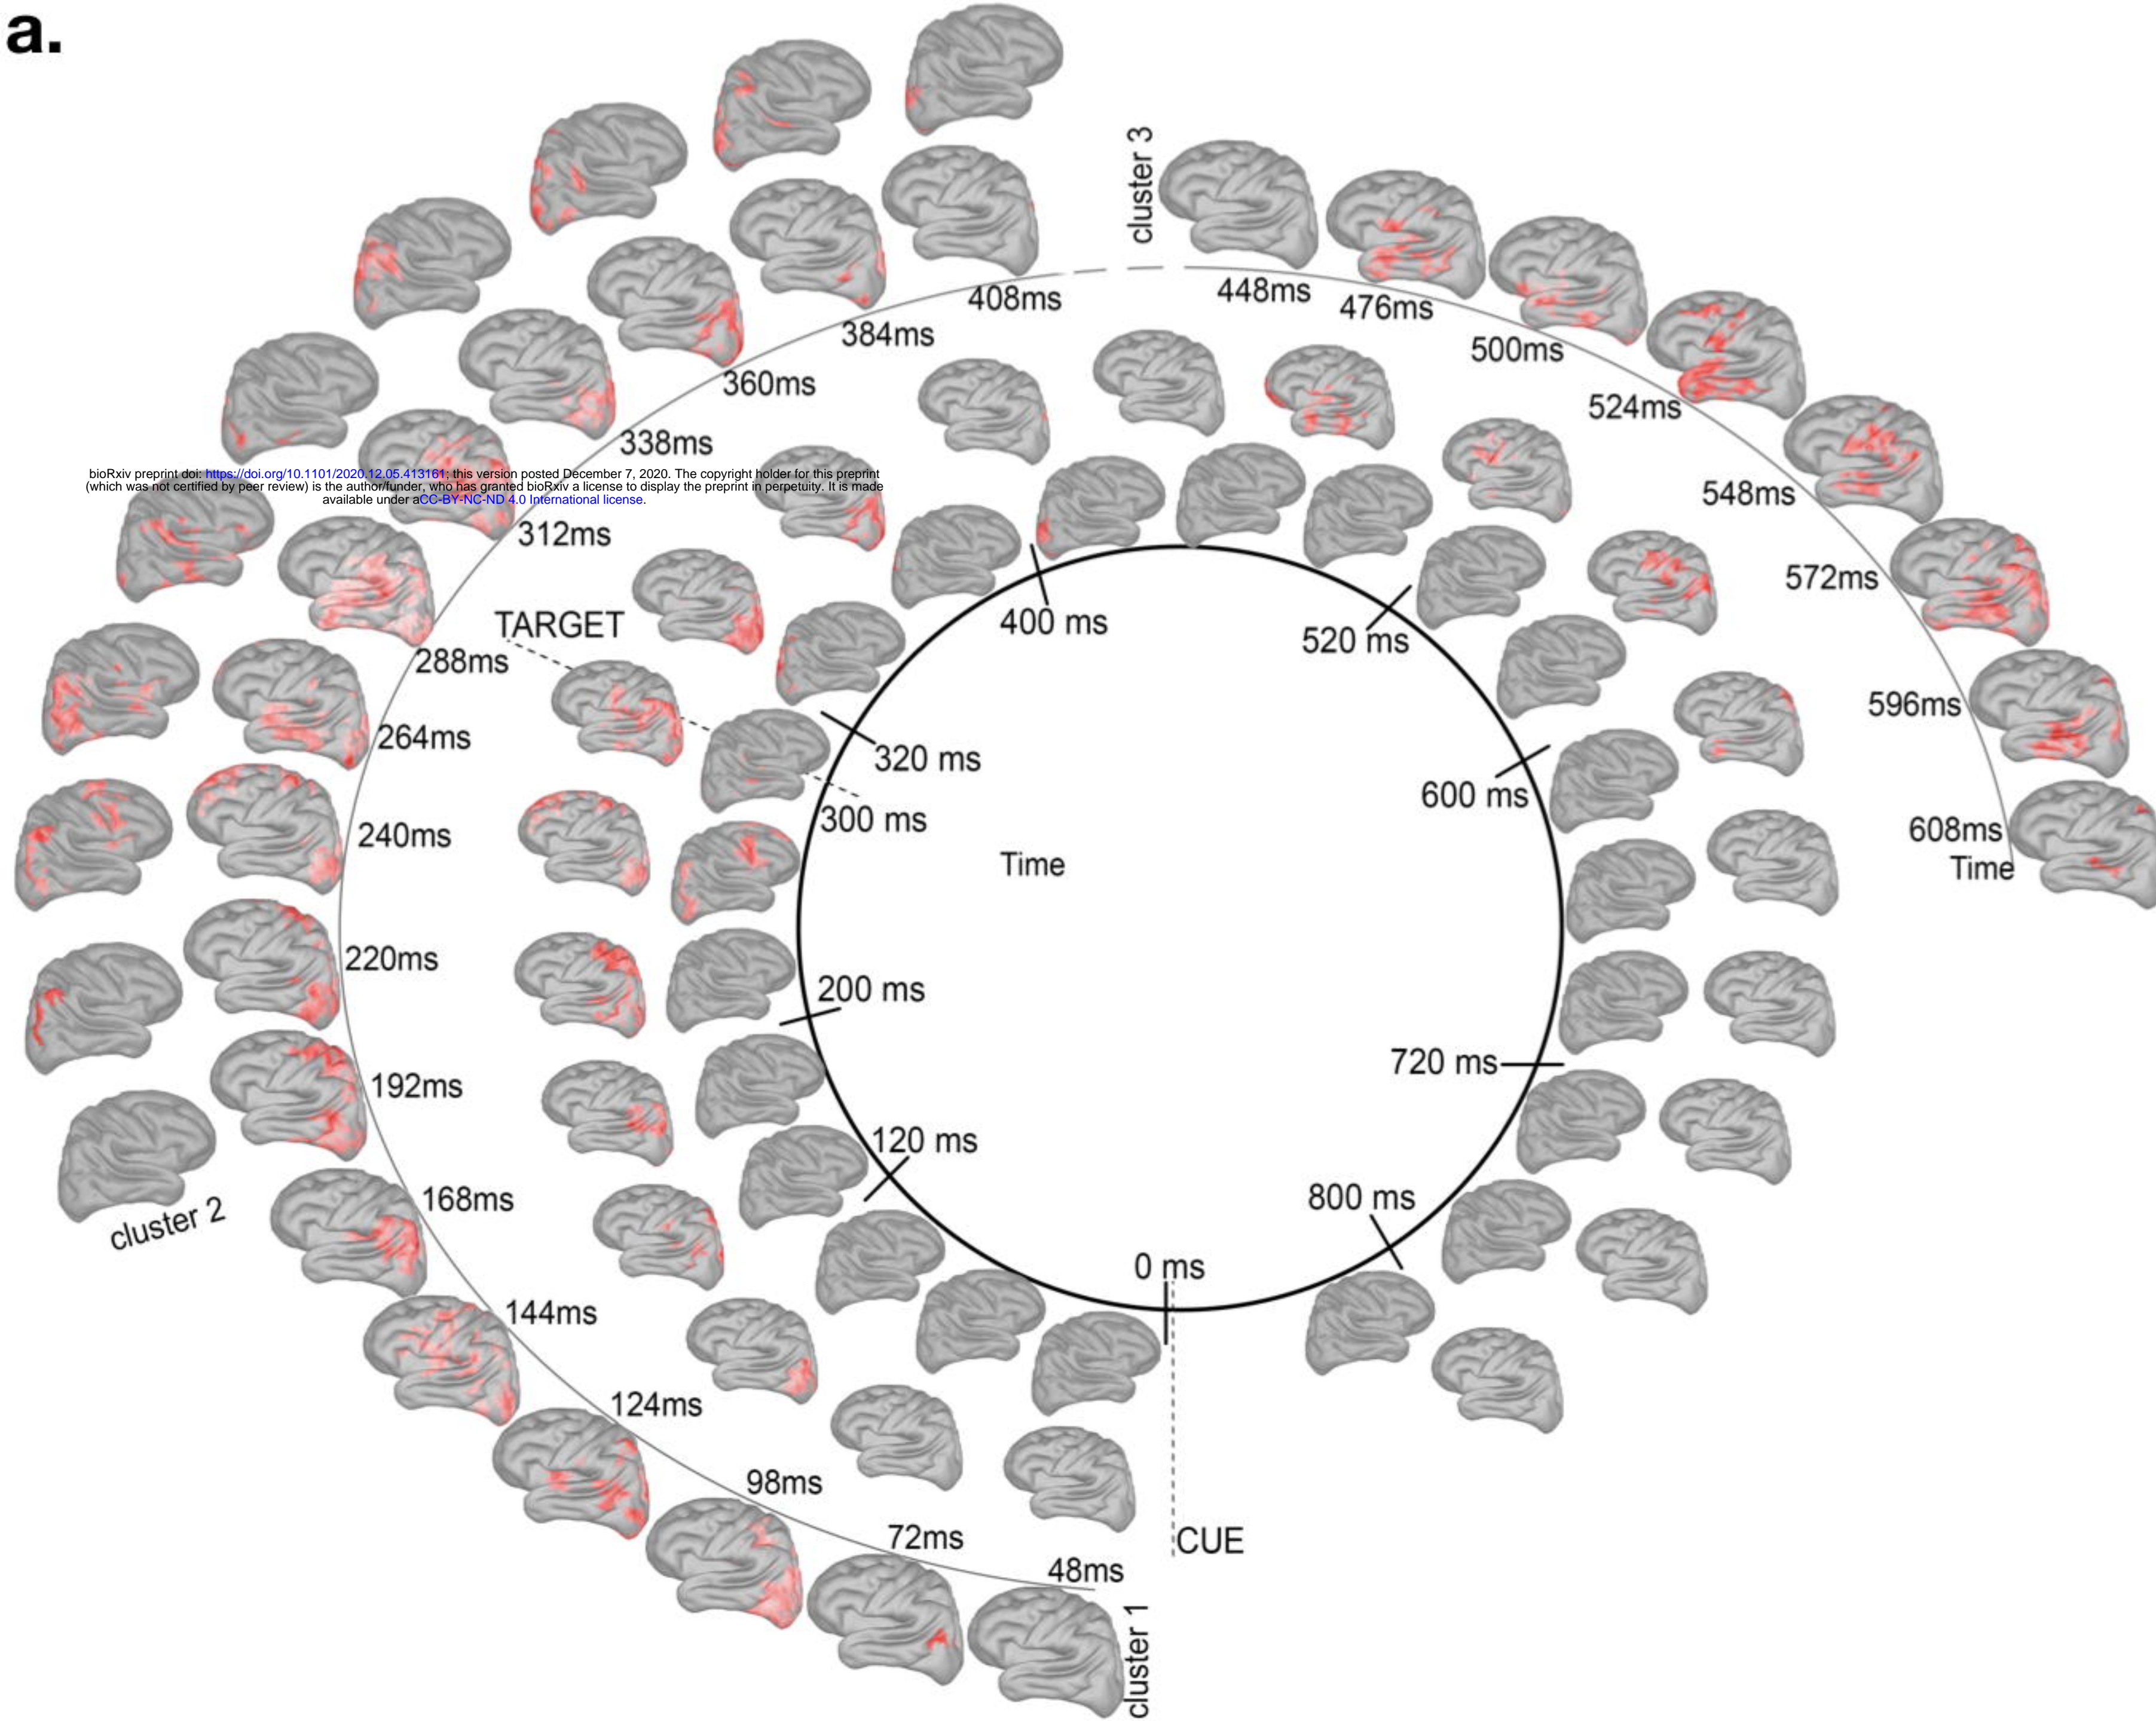**b.**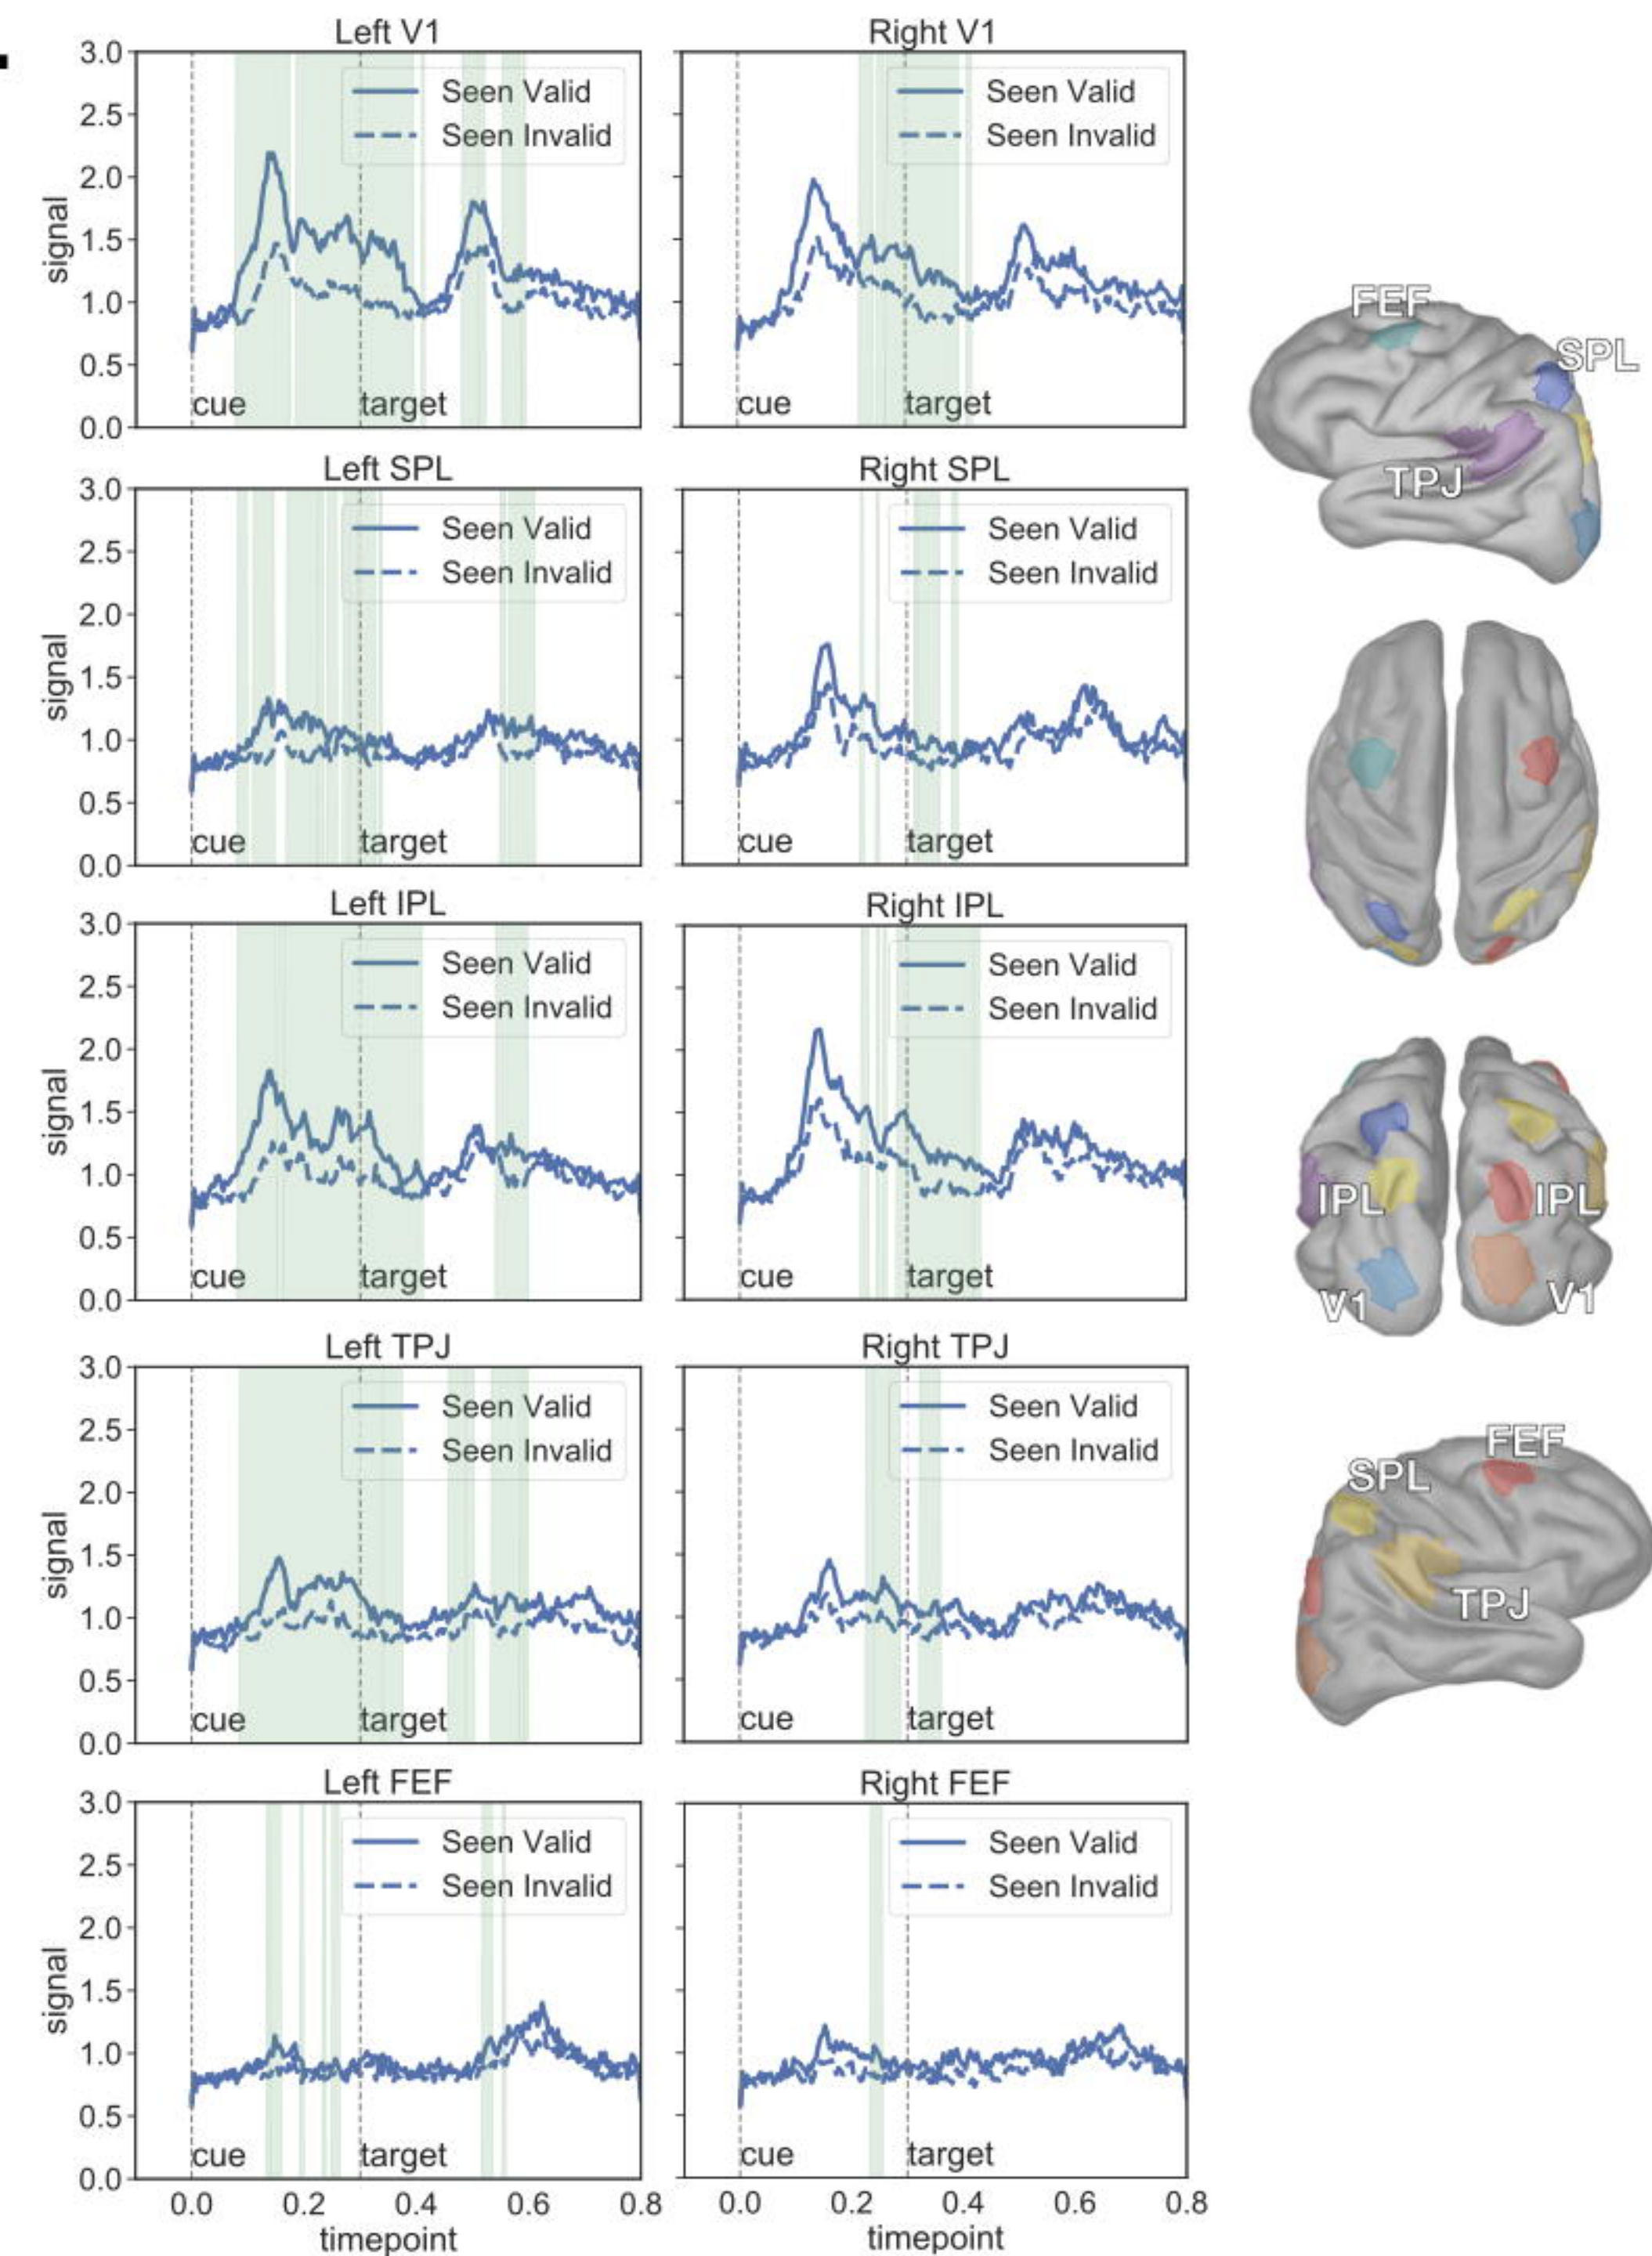



**a.**

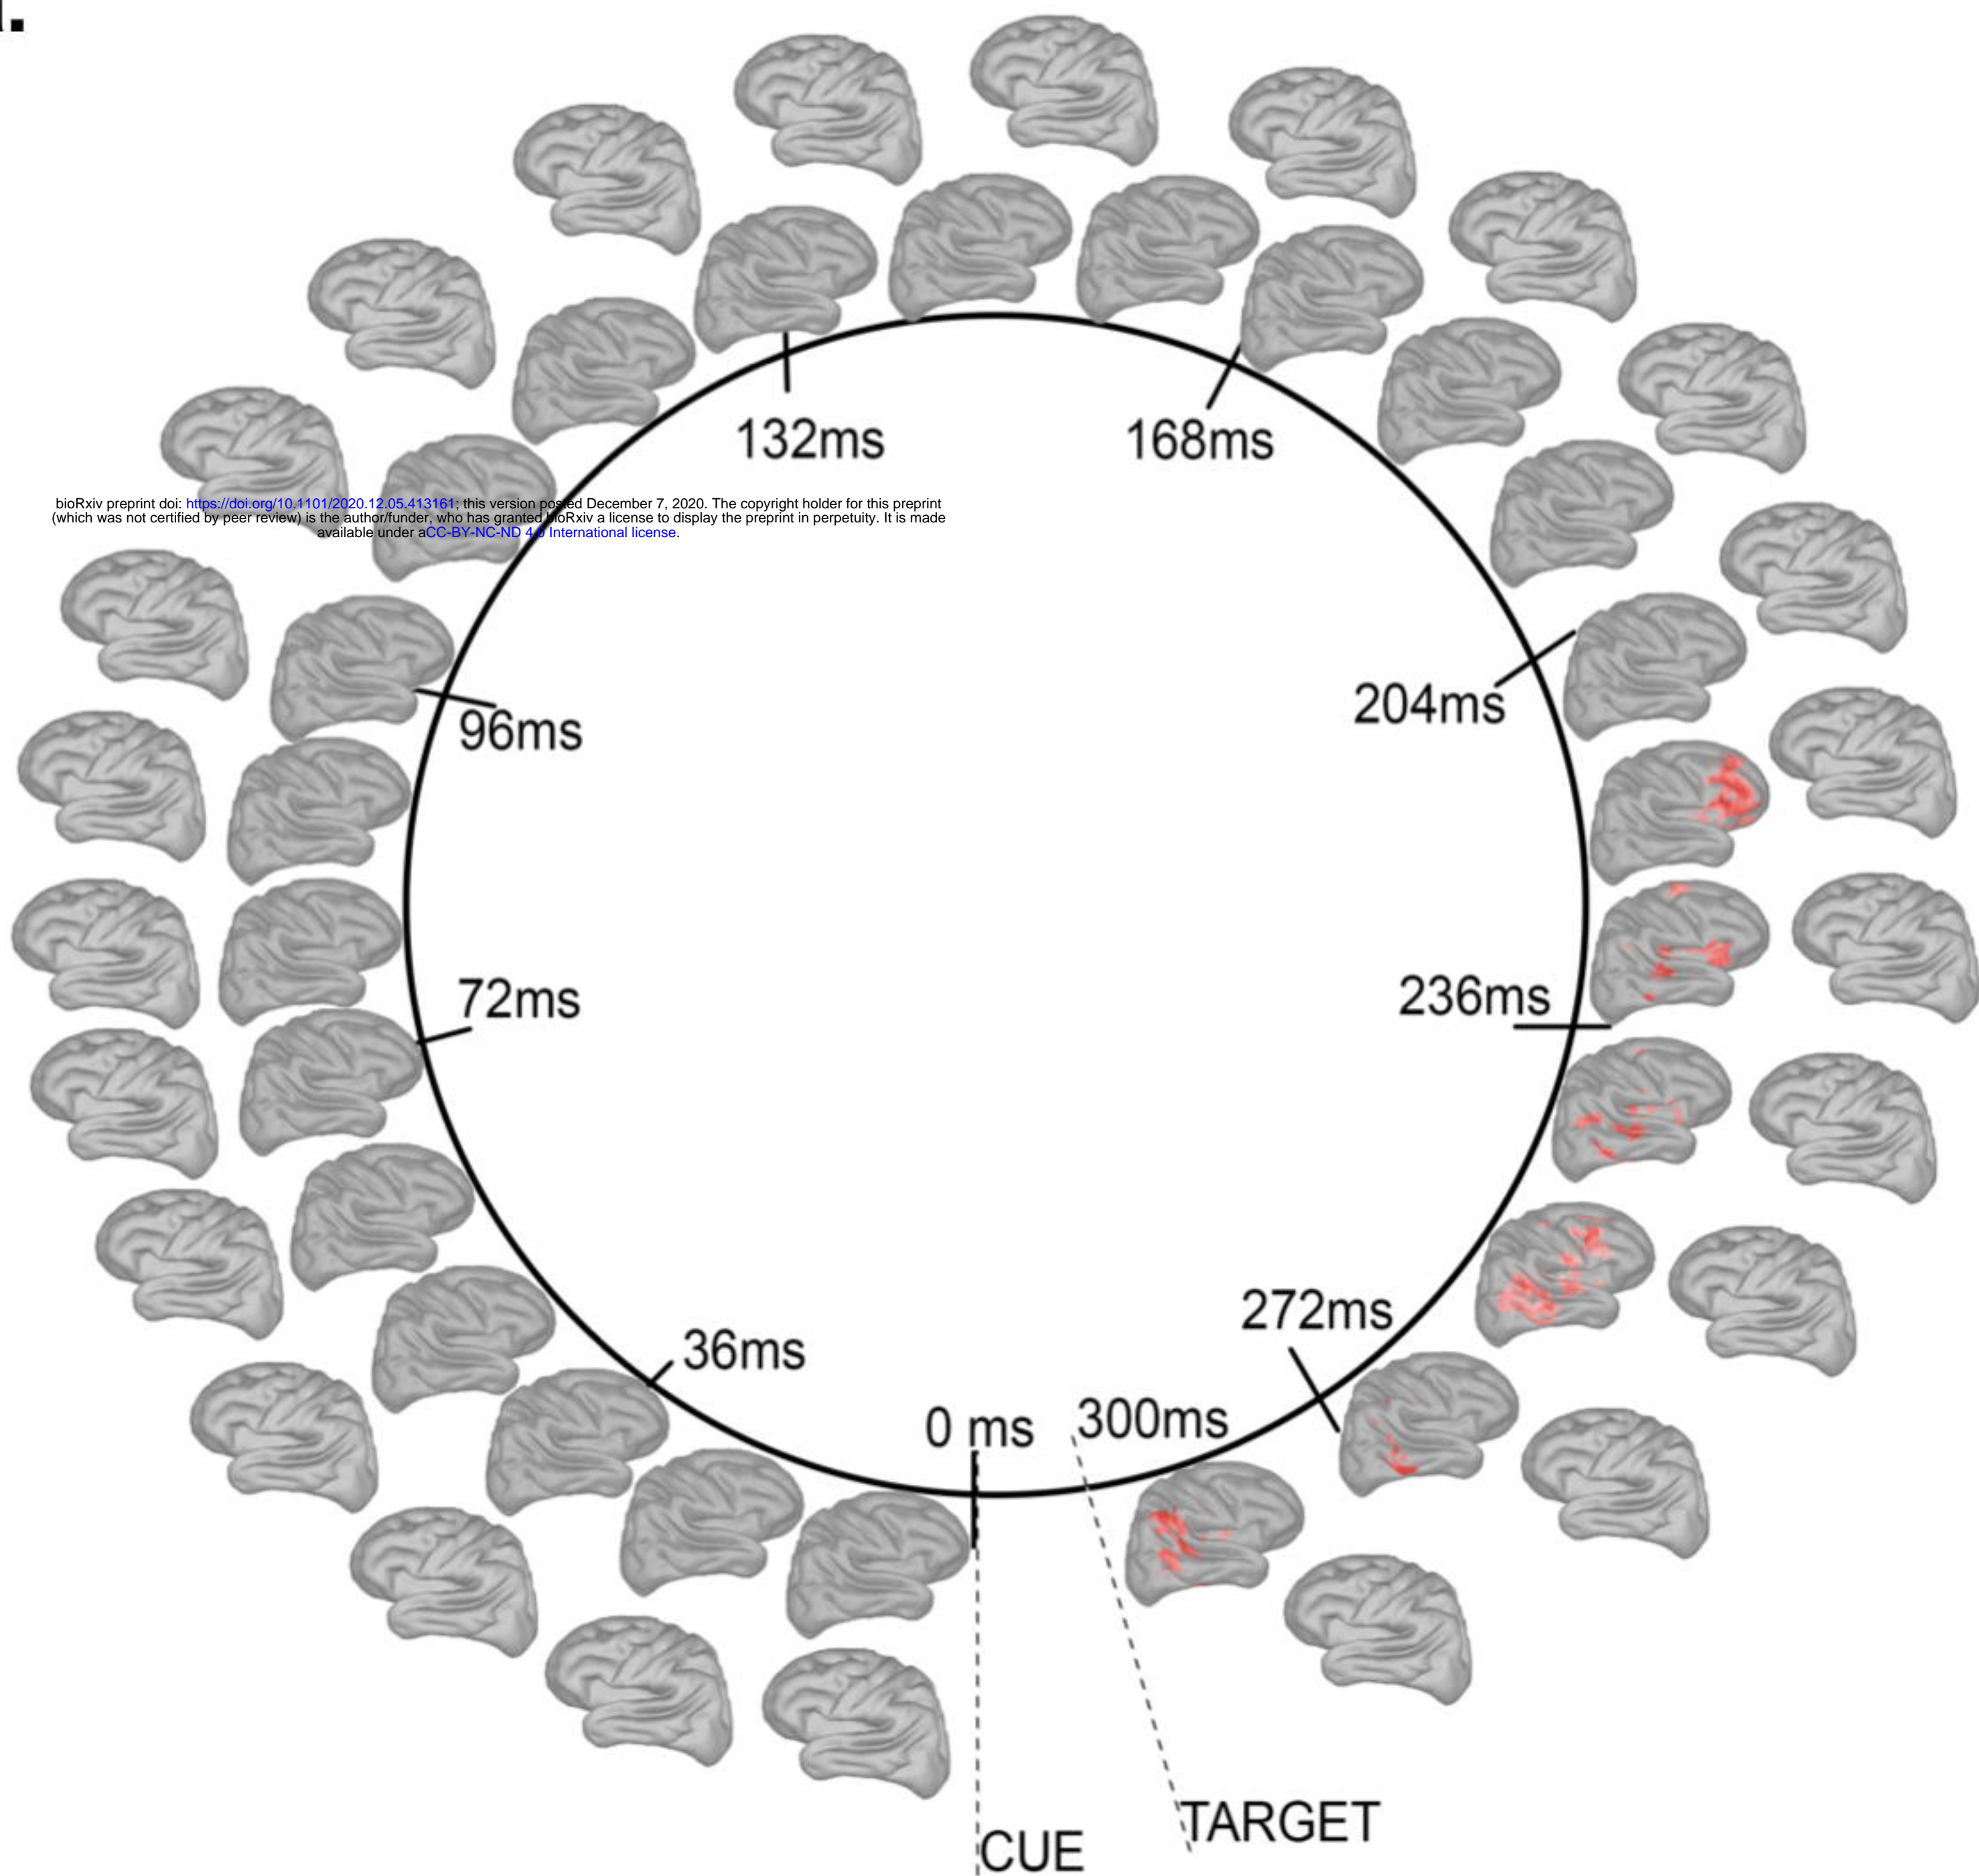

**b.**

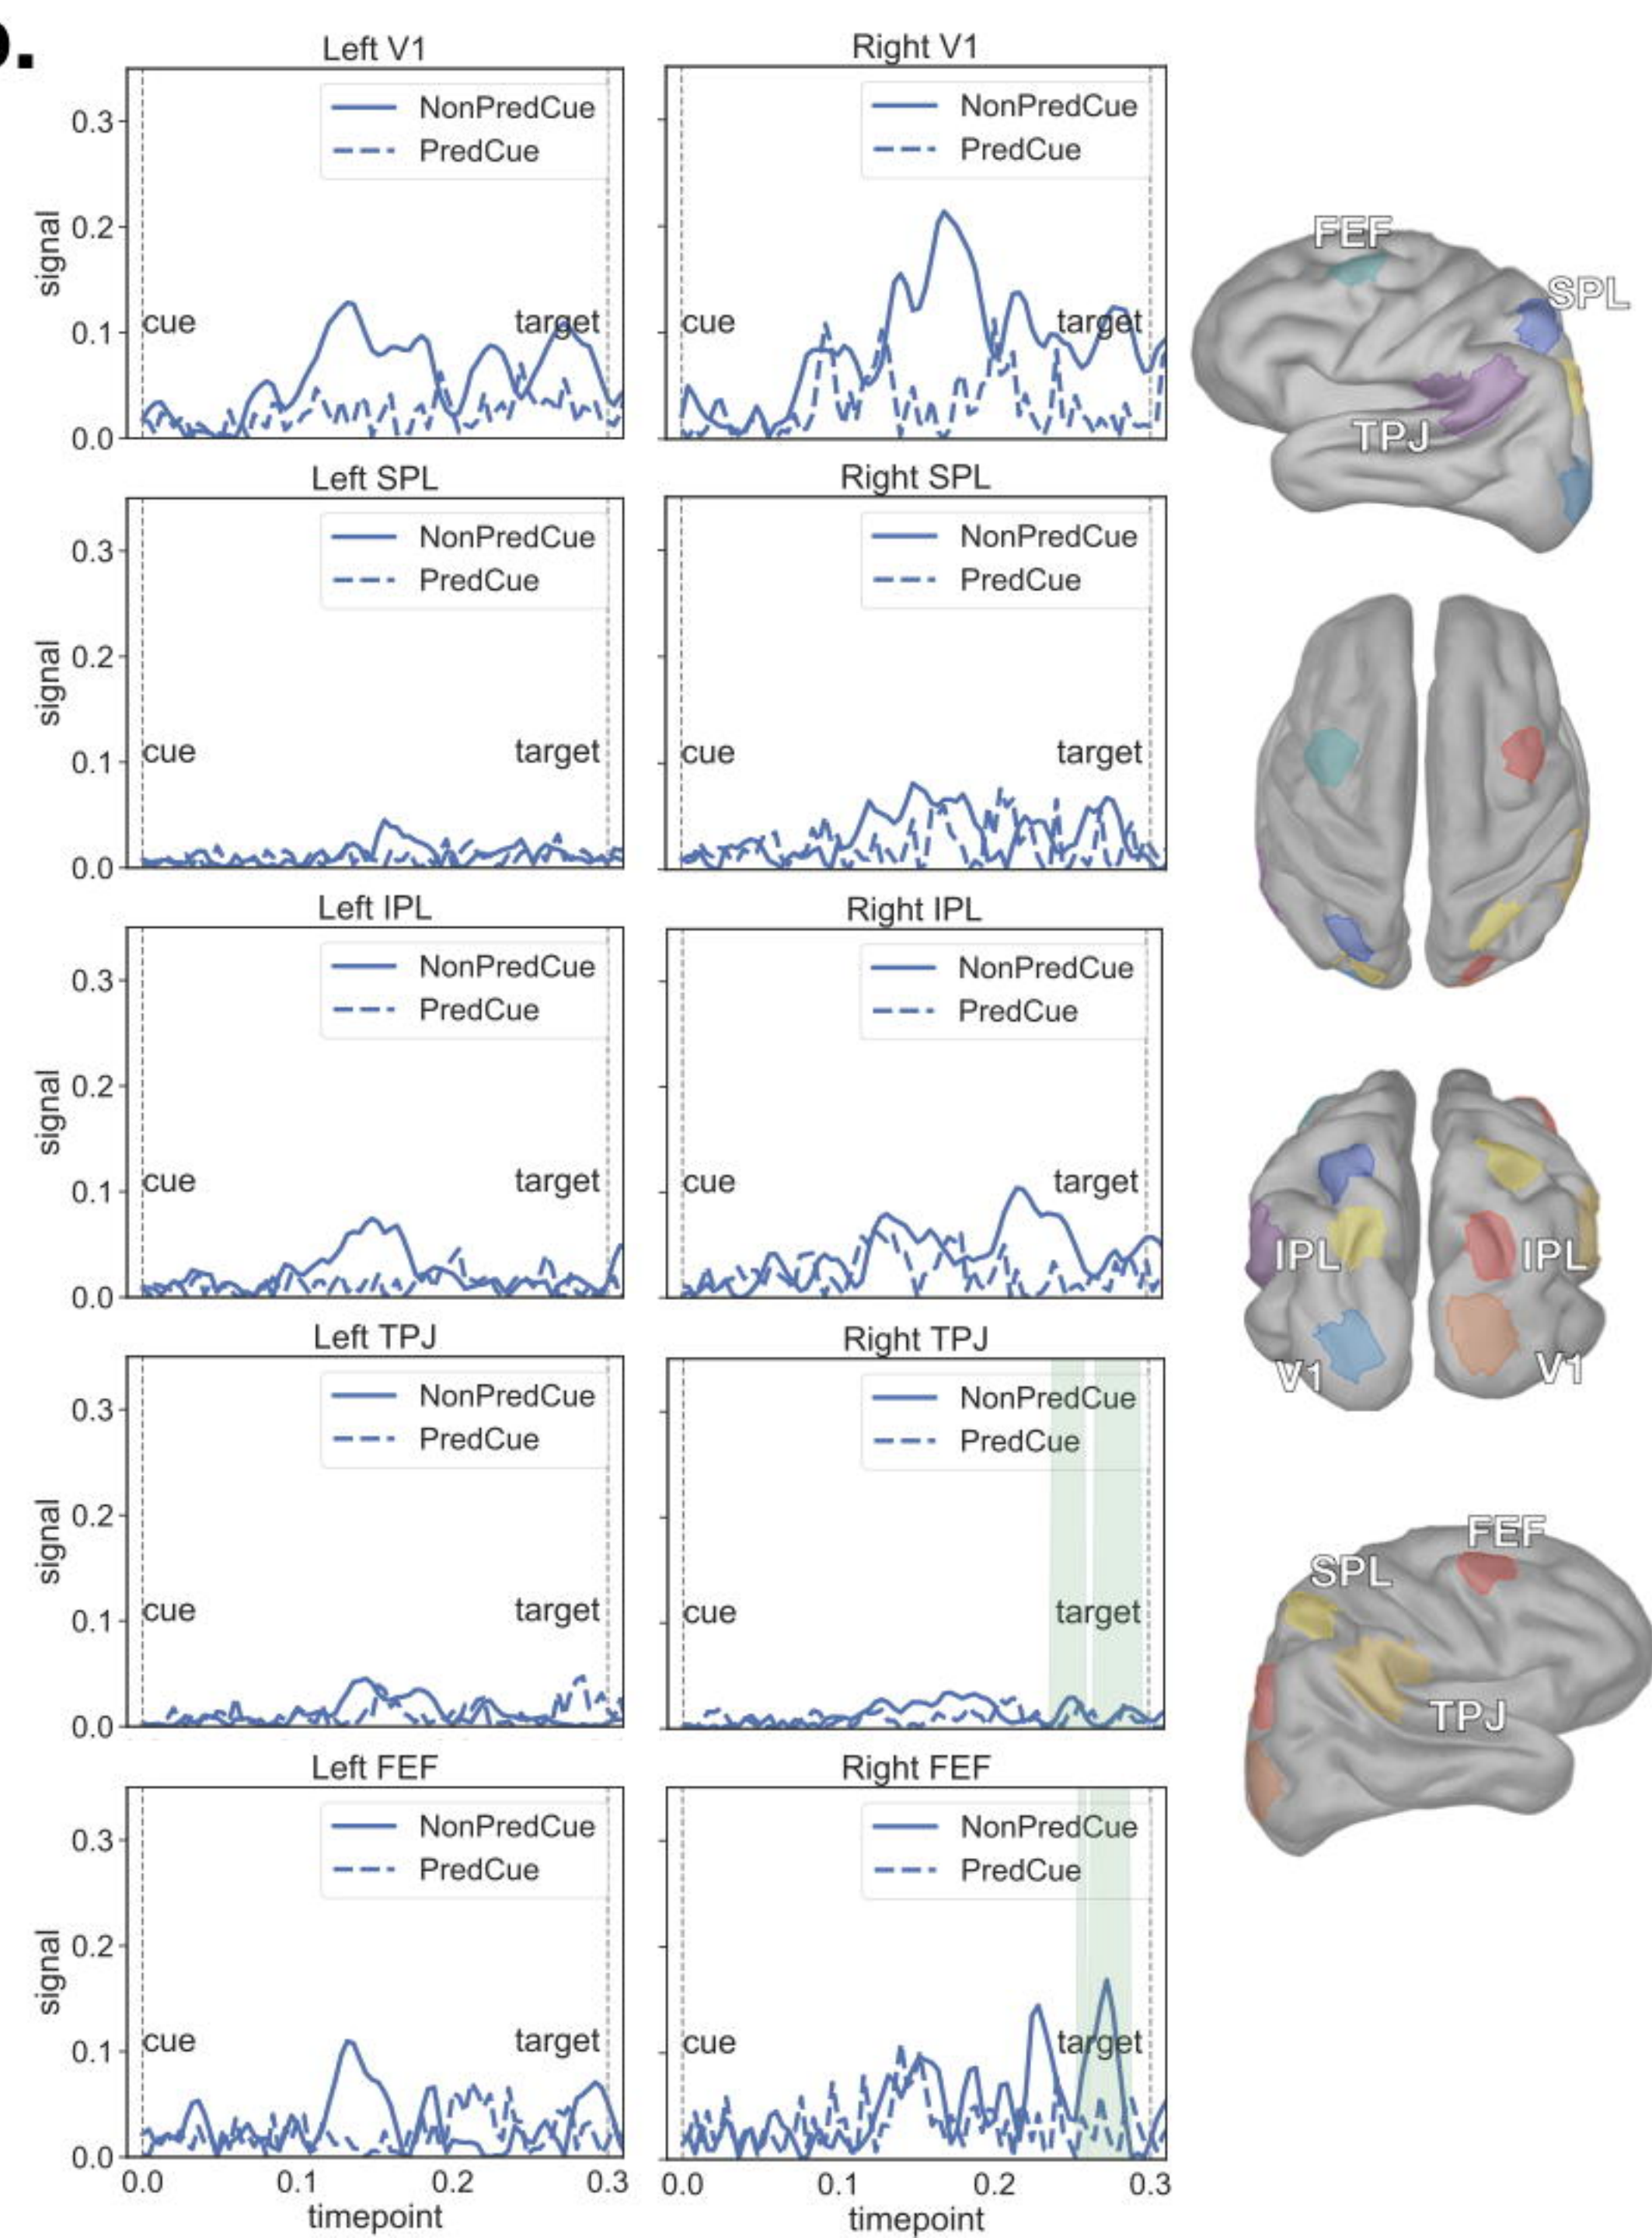

Source: https://www.biorxiv.org/content/biorxiv/early/2020/12/07/2020.12.05.413161.full.pdf
